# Supplementary material for: A Consistent Phylogenetic Backbone for the Fungi
Source: PubMed Central journal article supplement — Mol Biol Evol. 2011 Nov 22;29(5):1319–34. doi: 10.1093/molbev/msr285 (PMC3339314; doi:10.1093/molbev/msr285), 2011-11-22

## Supplementary Material online

**Supplementary Table S1.** Overview of the taxa used in this study and the corresponding data sources.

**Supplementary Table S2.** Taxon – Gene matrices for the three core ortholog sets *fungi* (A), *basidiomycota* (B), and *pezizomycotina* (C). Only fungal taxa with completely sequenced genomes are represented. Genes highlighted in yellow correspond to loci that have been suggested by the fungal tree of life project (AFTOL2) as candidate genes for fungal phylogeny reconstruction ([http://aftol.org/pages/AFTOL2\\_locib.html](http://aftol.org/pages/AFTOL2_locib.html)).

**Supplementary Table S3.** Description and sources of the fungal images shown in Fig. 3 and Supplementary Fig. S9.

**Supplementary Fig. S1.** Saturation plots for the 15 datasets used in this study. The slope of the linear regression line is given in the individual plots.

**Supplementary Fig. S2.** Supplementary Fig. S2. Bias for slowly evolving genes in EST directed gene selections. To illustrate the effect of EST taxon sampling and EST set size on the bias for selecting slowly evolving genes, we chose two sets of EST taxa from our data. Set A represents 20 taxa for which only 3,800 – 9,900 ESTs are available. Set B represents 20 taxa for which more than 10,000 ESTs each are available (max: 35,000). Both sets have almost all of the 1,206 fungi core orthologs represented (A: 1,161; B: 1,193). From these two core ortholog collections we constructed 20 subsets of genes using inclusion thresholds from 1 to 20. An inclusion threshold of  $k$  requires that a gene occur in at least  $k$  taxa in either set A or set B. For the resulting collections of genes we plotted the length distribution of the corresponding primer taxa trees. (A) shows the results for set A, and (B) shows the results for set B. The trend is the same for both taxon sets. A gene evolves slower on average the more EST sets it is represented in. However, this bias is alleviated for set B comprising taxa with many ESTs. Larger EST sets facilitate a more comprehensive sampling of genes encoded in a species' genome and have a higher probability to represent also genes that are expressed at lower levels. As a consequence, overlap sets of genes present in different large EST collections will be less biased towards highly expressed, slowly evolving genes.

**Supplementary Fig. S3.** Copy number of genes in the data set *fungi\_1*. The y-axis denotes the maximum number of copies for any of the 121 genes across the 99 analyzed fungal genomes.

**Supplementary Fig. S4.** GO-overrepresentation graph of the genes in the data sets *fungi\_1* (A) and *fungi\_2* (B). Shown are only the significantly overrepresented GO terms of the GO sub ontology Biological Process. The color code reflects the nominal p-value of the overrepresented terms from red (lower p-values) to yellow (higher p-values). Entries in the individual fields represent (from top): GO term Id; expected number of genes annotated with this GO term in the data subset, observed number of genes in the subset vs. number of genes in the full gene set annotated with this GO term; nominal p-value of the overrepresentation; term description. The summary of individual terms to complex processes was done by eye. Substantially more GO terms are overrepresented in the data set *fungi\_1* (A) than in *fungi\_2* (B). Moreover, the

degree of connectivity between the individual terms –a reflection of their functional correlation- is substantially higher in the fungi\_1 data set. A re-sampling test indicates that a slightly higher number of genes in fungi\_1 cannot explain the difference between the two data sets.

**Supplementary Fig. S5.** Evolutionary relationships of the fungi derived from data set fungi\_1. The maximum likelihood tree and the maximum parsimony tree are shown in **A** and **B**, respectively. Values on the individual branches denote bootstrap support. The Bayesian consensus tree is shown in **C**. This tree is based on partition 3 of the fungi\_1 set encompassing 39 genes. Branch support values denote Bayesian posterior probabilities. *Monacrosporium* haptotylum (Orbiliomycetes) is clearly misplaced in this tree and groups within the Basidiomycota. We trust that this effect represents a tree reconstruction artifact and does not reflect a phylogenetic signal in the data. Note that the Bayesian consensus trees from partitions 1 and 2 of fungi\_1 show the correct placement of *M. haptotylum* at the base of the Pezizomycotina. We therefore ignored this taxon when collapsing the Bayesian consensus tree for the supernet analysis. **D** shows the MRP supertree based on data set fungi\_1A, where again the values on the branches denote bootstrap support in %. A \* denotes 100% bootstrap support or a Bayesian posterior probability of 1. Names of taxa represented by genome sequences are written in capital letters, names of taxa represented by EST are in lower case. Note that branch lengths for the trees **A** and **C** reflect the expected numbers of substitutions (branches for the Microsporidia have been shortened by a factor of 10), while they have no meaning for trees **B** and **D**. The color code of the branches follows Fig. 3

**Supplementary Fig. S6.** Evolutionary relationships of the fungi derived from data set fungi\_2. The maximum likelihood tree and the maximum parsimony tree are shown in **A** and **B**, respectively. Values on the individual branches denote bootstrap support. The Bayesian consensus tree is shown in **C**. This tree is based on partition 3 of the fungi\_2 set encompassing 39 genes. Branch support values denote Bayesian posterior probabilities. The MRP supertree is shown in **D** where again the values on the branches denote bootstrap support in %. A star denotes 100% bootstrap support or a Bayesian posterior probability of 1. Names of taxa represented by genome sequences are written in capital letters, names of taxa represented by EST are in lower case. Note that branch lengths for the trees **A** and **C** reflect the expected numbers of substitutions (branches for the Microsporidia have been shortened by a factor of 10), while they have no meaning for trees **B** and **D**. The color code of the branches follows Fig. 3.

**Supplementary Fig. S7.** Evolutionary relationships of the Pezizomycotina inferred from data set pezizomycotina\_1. The maximum likelihood tree and the Bayesian consensus trees are shown in **A** and **B**, respectively. The respective values on the individual branches denote bootstrap support and Bayesian posterior probability. A \* denotes 100% bootstrap support or a Bayesian posterior probability of 1. Names of taxa represented by genome sequences are written in capital letters, names of taxa represented by EST are in lower case.

**Supplementary Fig. S8.** EST guided compilation of phylogenomic data sets selects for slowly evolving genes. The histogram shows the lengths of the trees connecting the six primer taxa for the 1,226 single copy genes in the *pezizomycotina* core ortholog set. The values for the subset of genes in pezizomycotina\_1 that have been selected due to their abundance in the EST data are colored in green.

**Supplementary Fig. S9.** The phylogenetic backbone of the fungi based on 15 datasets. The numbers of species represented by each leaf are given in parenthesis for the data sets fungi\_1 and fungi\_2, respectively. A \* denotes those instances where either one or both species are absent from data set fungi\_2 and are represented only in the supertree based on fungi\_2A. A '-' indicates that a taxon is entirely missing in a data set. Colors highlight major systematic groups of the fungi (Ascomycota: red; Basidiomycota: blue; Mucoromycotina: magenta; Glomeromycota: purple; Entomophthoromycotina: yellow; Blastocladiomycota: marine; Chytridiomycota/Neocallimastigomycota: green). Given the tentativeness in our reconstruction of the basal fungal relationships we keep the network structure for this part of the fungal backbone tree. Contractions of the dashed branches result in the topology that is suggested by our refined analysis of the early branching fungi with data set fungi\_3.

## Supplementary Table S1. Data sources

### Web-Resources:

**BaylorCollege:** <http://www.hgsc.bcm.tmc.edu>  
**Broad:** <http://www.broad.mit.edu>  
**CandidaGenomeDatabase:** <http://www.candidagenome.org>  
**Dictybase:** <http://dictybase.org>  
**Ensembl:** <http://www.ensembl.org>  
**Genolevures:** <http://www.genolevures.org>  
**Josephine Bay Paul Center:** <http://gmod.mbl.edu>  
**JGI:** <http://genome.jgi-psf.org>  
**KEGG:** [http://www.genome.jp/kegg/catalog/org\\_list.html](http://www.genome.jp/kegg/catalog/org_list.html)  
**NCBI:** <http://www.ncbi.nlm.nih.gov/projects>  
**NCBI/RefSeq:** <http://www.ncbi.nlm.nih.gov/RefSeq>  
**Podospora anserina Genome Project:** <http://podospora.igmors.u-psud.fr>  
**SaccharomycesGenomeDatabase:** <http://yeastgenome.org>  
**TBestDB:** <http://tbestdb.bcm.umontreal.ca>  
**UniGent:** <http://bioinformatics.psb.ugent.be/genomes>  
**Uniprot/Integr8:** <http://www.uniprot.org>  
**www.fungalgenomes.org:** <http://www.fungalgenomes.org>  
**Wormbase:** [www.wormbase.org](http://www.wormbase.org)  
**dbEST:** <http://www.ncbi.nlm.nih.gov/projects/dbEST>

| Genomes | Taxon Name                            | # Sequences* | Web-Resource              |
|---------|---------------------------------------|--------------|---------------------------|
|         | ALTERNARIA_BRASSICICOLA               | 10.688       | JGI                       |
|         | AEDES_AEGYPTI                         | 15.419       | Ensembl                   |
|         | AJELLOMYCES_CAPSULATUS                | 9.349        | Broad                     |
|         | AJELLOMYCES_DERMATITIDIS_ER-3         | 9.522        | Broad                     |
|         | ANTONOSPORA_LOCUSTAE                  | 2.606        | Josephine Bay Paul Center |
|         | ASCOSPHAERA_APIIS                     | 9.103        | BaylorCollege             |
|         | ASHBYA_GOSSYPII                       | 4.717        | Uniprot/Integr8           |
|         | ASPERGILLUS_CLAVATUS                  | 9.120        | Broad                     |
|         | ASPERGILLUS_FISCHERI                  | 10.403       | Broad                     |
|         | ASPERGILLUS_FLAVUS                    | 12.587       | Broad                     |
|         | ASPERGILLUS_FUMIGATUS                 | 9.629        | Uniprot/Integr8           |
|         | ASPERGILLUS_NIDULANS                  | 10.665       | Broad                     |
|         | ASPERGILLUS_NIGER                     | 11.200       | JGI                       |
|         | ASPERGILLUS_ORYZAE                    | 12.056       | Uniprot/Integr8           |
|         | ASPERGILLUS_TERREUS                   | 10.406       | Broad                     |
|         | BATRACHOCHYTRIUM_DENDROBATIDIS        | 8.732        | JGI                       |
|         | BOTRYOTINIA_FUCKELIANA                | 16.448       | Broad                     |
|         | CANDIDA_ALBICANS                      | 6.205        | CandidaGenomeDatabase     |
|         | CANDIDA_DUBLINIENSIS_CD36             | 5.860        | NCBI/RefSeq               |
|         | CANDIDA_GLABRATA                      | 5.199        | Uniprot/Integr8           |
|         | CANDIDA_PARAPSILOSIS                  | 5.733        | Broad                     |
|         | CANDIDA_TROPICALIS                    | 6.258        | Broad                     |
|         | CAPITELLA_SP_I_ECS-2004               | 32.415       | JGI                       |
|         | CAPSASPORA_OW CZARZAKI                | 8.381        | Broad                     |
|         | CHAETOMIUM_GLOBOSUM                   | 11.124       | Broad                     |
|         | CLAVISPORA_LUSITANIAE                 | 5.941        | Broad                     |
|         | COCCIDIOIDES_IMMIS                    | 10.352       | Broad                     |
|         | COCCIDIOIDES_POSADASII                | 9.897        | Broad                     |
|         | COCHLIOBOLUS_HETEROSTROPHUS           | 9.633        | JGI                       |
|         | COPRINOPSIS_CINEREA                   | 13.544       | Broad                     |
|         | CRYPHONECTRIA_PARASITICA              | 11.184       | JGI                       |
|         | CRYPTOCOCCUS_NEOFORMANS_VAR._NEOFORMA | 6.440        | Uniprot/Integr8           |
|         | DANIO_RERIO                           | 21.322       | Ensembl                   |
|         | DEBARYOMYCES_HANSENI                  | 6.242        | Uniprot/Integr8           |
|         | DICTYOSTELIUM_DISCOIDEUM_AX4          | 13.328       | Dictybase                 |
|         | DICTYOSTELIUM_PURPUREUM_QSDP1         | 12.410       | JGI                       |
|         | ENCEPHALITOOZON_CUNICULI              | 1.909        | Uniprot/Integr8           |
|         | ENTEROCYTOZON_BIENEUSI_H348           | 3.632        | NCBI/RefSeq               |
|         | FUSARIUM_GRAMINEARUM                  | 13.321       | Broad                     |
|         | FUSARIUM_OXYSPORUM_F_SP_LYCOPERSICI   | 17.608       | Broad                     |
|         | FUSARIUM_VERTICILLIOIDES              | 14.177       | Broad                     |

|                                        |        |                                   |
|----------------------------------------|--------|-----------------------------------|
| GALLUS_GALLUS                          | 16.736 | Ensembl                           |
| HETEROBASIDIUM_ANNOSUM                 | 12.299 | JGI                               |
| HOMO_SAPIENS                           | 21.673 | Ensembl                           |
| HYDRA_MAGNIPAPILLATA                   | 17.398 | NCBI/RefSeq                       |
| KLUYVEROMYCES_LACTIS                   | 5.071  | Uniprot/Integr8                   |
| KLUYVEROMYCES_THERMOTOLERANS           | 5.092  | Genolevures                       |
| KLUYVEROMYCES_WALTII                   | 5.213  | KEGG                              |
| LACCARIA_BICOLOR                       | 20.614 | JGI                               |
| LODDEROMYCES_ELONGISPORUM              | 5.799  | Broad                             |
| LOTTIA_GIGANTEA                        | 23.851 | JGI                               |
| MAGNAPORTHE_GRISEA                     | 12.684 | Uniprot/Integr8                   |
| MALASSEZIA_GLOBOSA_CBS_7966            | 4.286  | NCBI/RefSeq                       |
| MELAMPSORA_LARICIS-POPULINA            | 16.831 | JGI                               |
| MICROSPORUM_CANIS_CBS_113480           | 8.765  | Broad                             |
| MICROSPORUM_GYPSEUM_CBS_118893         | 8.876  | Broad                             |
| MONILOPHTHORA_PERNICIOSA_FA553         | 13.560 | NCBI/RefSeq                       |
| MONOSIGA_BREVICOLLIS                   | 9.196  | JGI                               |
| MUCOR_CIRCINELLOIDES                   | 10.930 | JGI                               |
| MUS_MUSCULUS                           | 23.497 | Ensembl                           |
| MYCOSPHAERELLA_FIJIENSIS               | 10.313 | JGI                               |
| MYCOSPHAERELLA_GRAMINICOLA             | 11.395 | JGI                               |
| NECTRIA_HAEMATOCOCCA_MPVI              | 15.707 | JGI                               |
| NEMATOSTELLA_VECTENSIS                 | 27.273 | JGI                               |
| NEUROSPORA_CRASSA                      | 9.827  | Uniprot                           |
| NEUROSPORA_DISCRETA_FGSC_8579_MAT_A    | 9.948  | JGI                               |
| NEUROSPORA_TETRASPERMA_FGSC_2508_MAT_A | 10.640 | JGI                               |
| NOSEMA_CERANAE                         | 2.082  | NCBI                              |
| ORYZIAS_LATIPES                        | 19.686 | Ensembl                           |
| PARACOCCIDIOIDES_BRASILIENSIS          | 9.263  | Broad                             |
| PEDICULUS_HUMANUS                      | 10.773 | VectorBase                        |
| PENICILLIUM_CHRYSOGENUM                | 12.773 | Uniprot/Integr8                   |
| PENICILLIUM_MARNEFFEI                  | 10.638 | NCBI/RefSeq                       |
| PHANEROCHAETE_CHRYSOSPORIUM            | 10.048 | JGI                               |
| PHYCOMYCES_BLAKEESLEEANUS              | 14.792 | JGI                               |
| PICHIA_GUILLIERMONDII                  | 5.920  | Broad                             |
| PICHIA_PASTORIS                        | 5.313  | UniGent                           |
| PICHIA_STIPITIS                        | 5.807  | JGI                               |
| PLEUROTUS_OSTREATUS_PC15               | 11.603 | JGI                               |
| PODOSPORA_ANSERINA                     | 10.614 | Podospora anserina Genome Project |
| POSTIA_PLACENTA                        | 9.113  | JGI                               |
| PRISTIONCHUS_PACIFICUS                 | 29.644 | Wormbase                          |
| PUCCINIA_GRAMINIS_F_SP_TRITICI         | 20.566 | Broad                             |
| PYRENOPHORA_TRITICI                    | 12.169 | Broad                             |
| RHIZOPUS_ORYZAE                        | 17.467 | Broad                             |
| SACCHAROMYCES_BAYANUS                  | 6.297  | NCBI                              |
| SACCHAROMYCES_CASTELLII                | 4.677  | SaccharomycesGenomeDatabase       |
| SACCHAROMYCES_CEREVISIAE               | 6.698  | Ensembl                           |
| SACCHAROMYCES_KLUYVERI                 | 5.321  | Genolevures                       |
| SACCHAROMYCES_KUDRIAVZEVII             | 7.208  | NCBI                              |
| SACCHAROMYCES_MIKATAE                  | 6.526  | NCBI                              |
| SACCHAROMYCES_PARADOXUS                | 6.174  | NCBI                              |
| SCHIZOPHYLLUM_COMMUNE                  | 13.210 | JGI                               |
| SCHIZOSACCHAROMYCES_JAPONICUS          | 5.167  | Broad                             |
| SCHIZOSACCHAROMYCES_OCTOSPORUS         | 4.907  | Broad                             |
| SCHIZOSACCHAROMYCES_POMBE              | 4.976  | Uniprot/Integr8                   |
| SCHIZOSACCHAROMYCES_SP_OY26            | 5.057  | Broad                             |
| SCLEROTINIA_SCLEROTIORUM               | 14.522 | Broad                             |
| SPIZELLOMYCES_PUNCTATUS                | 8.804  | Broad                             |
| SPOROBOLOMYCES_ROSEUS                  | 5.536  | JGI                               |
| STAGONOSPORA_NODORUM                   | 16.597 | Broad                             |
| TALAROMYCES_STIPITATUS                 | 13.252 | NCBI/RefSeq                       |
| THIELAVIA_TERRESTRIS                   | 9.815  | JGI                               |
| TREMELLA_MESENERICA                    | 8.313  | JGI                               |
| TRICHODERMA_ATROVIRIDE                 | 11.100 | JGI                               |
| TRICHODERMA_REESEI                     | 9.143  | JGI                               |
| TRICHODERMA_VIRENS                     | 11.643 | JGI                               |
| TRICHOPHYTON_EQUINUM_CBS127.97         | 8.560  | Broad                             |

|                                  |        |                 |
|----------------------------------|--------|-----------------|
| TRICHOPLAX_ADHAERENS             | 11.520 | JGI             |
| TUBER_MELANOSPORUM               | 7.496  | Genoscope       |
| UNCINOCARPUS_REESII              | 7.798  | Broad           |
| USTILAGO_MAYDIS                  | 6.522  | Broad           |
| VANDERWALTOZYMA_POLYSPORA        | 5.345  | Uniprot/Integr8 |
| VERTICILLIUM_ALBO-ATRUM_VAMS.102 | 10.220 | Broad           |
| VERTICILLIUM_DAHLIAE_VDLS.17     | 10.535 | Broad           |
| XENOPUS_TROPICALIS               | 18.023 | Ensembl         |
| YARROWIA_LIPOLYTICA              | 6.525  | Uniprot/Integr8 |
| ZYGOSACCHAROMYCES_ROUXII         | 4.991  | Genolevures     |

---

**ESTs**

|                                     |       |         |
|-------------------------------------|-------|---------|
| Agaricus_bisporus                   | 612   | dbEST   |
| Allomyces_macrozynus                | 2.410 | dbEST   |
| Alternaria_alternata                | 269   | dbEST   |
| Amoebidium_parasiticum              | 1.333 | TBestDB |
| Amorphotheca_resinae                | 4.289 | dbEST   |
| Antrrodia_cinnamomea                | 5.088 | dbEST   |
| Armillariella_tabescens             | 130   | dbEST   |
| Aureobasidium_pullulans             | 4.705 | dbEST   |
| Blastocladiella_emersonii           | 7.145 | dbEST   |
| Blumeria_graminis_f_sp_hordei       | 7.750 | dbEST   |
| Blumeria_graminis_f_sp_hordei_DH14  | 5.000 | dbEST   |
| Cercospora_nicotianae               | 188   | dbEST   |
| Cercospora_zeae-maydis              | 6.885 | dbEST   |
| Chaetomium_cupreum                  | 2.238 | dbEST   |
| Claviceps_purpurea                  | 4.753 | dbEST   |
| Cochliobolus_lunatus                | 937   | dbEST   |
| Colletotrichum_acutatum             | 461   | dbEST   |
| Colletotrichum_higginsianum         | 708   | dbEST   |
| Colletotrichum_trifolii             | 627   | dbEST   |
| Conidiobolus_coronatus              | 4.771 | dbEST   |
| Cordyceps_bassiana                  | 5.156 | dbEST   |
| Cordyceps_militaris                 | 1.792 | dbEST   |
| Corynascus_heterothallicus          | 4.576 | dbEST   |
| Cronartium_quercuum_f_sp_fusifforme | 349   | dbEST   |
| Cryptococcus_laurentii              | 3.366 | dbEST   |
| Cunninghamella_elegans              | 5.029 | dbEST   |
| Edhazardia_aedis                    | 143   | dbEST   |
| Emericella_nidulans                 | 7.492 | dbEST   |
| Epichloe_festucaae                  | 8.165 | dbEST   |
| Fusarium_oxysporum_f_sp_cucumerinum | 3.840 | dbEST   |
| Fusarium_oxysporum_f_sp_melonis     | 1.192 | dbEST   |
| Fusarium_sporotrichioides           | 3.675 | dbEST   |
| Ganoderma_lucidum                   | 617   | dbEST   |
| Geomyces_pannorum                   | 4.532 | dbEST   |
| Gibberella_fujikuroi                | 97    | dbEST   |
| Gigaspora_margarita                 | 260   | dbEST   |
| Gigaspora_rosea                     | 347   | dbEST   |
| Gloeophyllum_trabeum                | 4.574 | dbEST   |
| Glomerella_cingulata                | 825   | dbEST   |
| Glomus_intraradices                 | 2.340 | dbEST   |
| Glomus_versiforme                   | 331   | dbEST   |
| Hebeloma_cylindrosporum             | 2.709 | dbEST   |
| Hortaea_werneckii                   | 146   | dbEST   |
| Hypocrea_lixii                      | 6.074 | dbEST   |
| Isaria_tenuipes                     | 298   | dbEST   |
| Lactarius_quietus                   | 415   | dbEST   |
| Lentinula_edodes                    | 4.092 | dbEST   |
| Leptosphaeria_maculans              | 723   | dbEST   |
| Leucosporidium_scottii              | 4.151 | dbEST   |
| Metarhizium_anisopliae              | 1.701 | dbEST   |
| Metarhizium_anisopliae_var_acridum  | 1.523 | dbEST   |
| Microbotryum_violaceum              | 7.878 | dbEST   |
| Monacrosporium_haptotylum           | 1.157 | dbEST   |
| Mortierella_verticillata            | 2.307 | TBestDB |
| Mycosphaerella_populorum            | 202   | dbEST   |
| Neocallimastix_patriciarum          | 624   | dbEST   |
| Neotyphodium_lolii                  | 3.856 | dbEST   |

|                                       |       |         |
|---------------------------------------|-------|---------|
| Nuclearia_simplex_strain_2            | 675   | TBestDB |
| Nuclearia_simplex_strain_4            | 720   | TBestDB |
| Oidiodendron_maius                    | 216   | dbEST   |
| Ophiostoma_novo-ulmi_subsp._novo-ulmi | 447   | dbEST   |
| Ophiostoma_piliferum                  | 3.779 | dbEST   |
| Passalora_fulva                       | 531   | dbEST   |
| Paxillus_involutus                    | 3.412 | dbEST   |
| Phaeosphaeria_nodorum_SN15            | 6.474 | dbEST   |
| Phakopsora_pachyrhizi                 | 6.453 | dbEST   |
| Phlebiopsis_gigantea                  | 181   | dbEST   |
| Phomopsis_sp._G2-919                  | 131   | dbEST   |
| Piromyces                             | 4.770 | dbEST   |
| Pisolithus_microcarpus                | 572   | dbEST   |
| Pisolithus_tinctorius                 | 395   | dbEST   |
| Pneumocystis_carinii                  | 1.803 | dbEST   |
| Roccella_montagnei                    | 620   | dbEST   |
| Saitoella_complicata                  | 1.116 | dbEST   |
| Sporobolomyces_roseus_IAM_13481       | 5.240 | dbEST   |
| Suillus_luteus                        | 429   | dbEST   |
| Taphrina_deformans                    | 1.422 | dbEST   |
| Thermomyces_lanuginosus               | 3.832 | dbEST   |
| Thielavia_terrestris                  | 9.700 | dbEST   |
| Trametes_versicolor                   | 3.037 | dbEST   |
| Trichoderma_aggressivum               | 577   | dbEST   |
| Trichoderma_asperellum                | 2.585 | dbEST   |
| Trichoderma_longibrachiatum           | 1.008 | dbEST   |
| Trichoderma_stromaticum               | 814   | dbEST   |
| Trichoderma_viride                    | 1.005 | dbEST   |
| Trichophyton_rubrum_CBS_118892        | 424   | dbEST   |
| Tuber_borchii                         | 2.091 | dbEST   |
| Uromyces_appendiculatus               | 4.885 | dbEST   |
| Uromyces_viciae-fabae                 | 577   | dbEST   |
| Wolfiporia_cocos                      | 180   | dbEST   |
| Zoophthora_radicans                   | 582   | dbEST   |

---

<sup>1</sup>Number of annotated genes in the genome sequences or, alternatively number of non-redundant EST contigs.

### Supplementary Table S3.

**Chytridiomycota:** *Spizellomyces punctatus*

<http://biomesfifth10.wikispaces.com/Coral+Reef+Facts>

Creative Commons Attribute Share-Alike License 3.0

**Neocallimastigomycotina:** *Neocallimastix frontalis*

Copyright: Kerstin Voigt

**Nuclearia:** *Nuclearia termophila*

[http://en.wikipedia.org/wiki/File:Nuclearia\\_sp\\_Nikko.jpg](http://en.wikipedia.org/wiki/File:Nuclearia_sp_Nikko.jpg)

Creative Commons Attribute Share-Alike License 2.5

**Microsporidia:** *Fibrillanosema crangonycis*

[http://en.wikipedia.org/wiki/File:Fibrillanosema\\_spore.jpg](http://en.wikipedia.org/wiki/File:Fibrillanosema_spore.jpg)

Creative Commons Attribution-Share Alike 3.0 Unported

**Glomeromycota:** *Gigaspora margarita*

[http://en.wikipedia.org/wiki/File:Gigaspora\\_margarita.JPG](http://en.wikipedia.org/wiki/File:Gigaspora_margarita.JPG)

Creative Commons Attribution 3.0 Unported

**Mucoromycotina:** *Rhizopus nigricans*

Copyright: Kerstin Voigt

**Basidiomycota:** *Chroogomphus rutilus*

[http://de.wikipedia.org/w/index.php?title=Datei:Kupferroter\\_Gelbfu%C3%9F.jpg&filetimestamp=20040907220848](http://de.wikipedia.org/w/index.php?title=Datei:Kupferroter_Gelbfu%C3%9F.jpg&filetimestamp=20040907220848)

Creative Commons Attribution 3.0 Unported

**Taphrinomycotina:** *Taphrina crataegi*

<http://de.wikipedia.org/wiki/Datei:Taphrina.crataegi.-.lindsey.jpg>

Creative Commons Attribution 3.0 Unported

**Saccharomycotina:** *Saccharomyces cerevisiae*

[http://en.wikipedia.org/wiki/File:S\\_cerevisiae\\_under\\_DIC\\_microscopy.jpg](http://en.wikipedia.org/wiki/File:S_cerevisiae_under_DIC_microscopy.jpg)

public domain

**Pepizomycetes:** *Morchella esculenta*

[http://de.wikipedia.org/w/index.php?title=Datei:Morchella\\_esculenta\\_84915.jpg&filetimestamp=20110511151318](http://de.wikipedia.org/w/index.php?title=Datei:Morchella_esculenta_84915.jpg&filetimestamp=20110511151318)

Creative Commons Attribution 3.0 Unported

**Eurotiomycetes:** *Aspergillus fumigatus*

<http://de.wikipedia.org/w/index.php?title=Datei:Aspergillus.gif&filetimestamp=20060111215647>

public domain

**Dothideomycetes:** *Venturia inaequalis*

[http://en.wikipedia.org/wiki/File:Apple\\_scab\\_SEM.jpg](http://en.wikipedia.org/wiki/File:Apple_scab_SEM.jpg)

public domain



**Sordariomycetes:** *Camarops polysperma*

[http://de.wikipedia.org/w/index.php?title=Datei:Camarops\\_polysperma.jpg](http://de.wikipedia.org/w/index.php?title=Datei:Camarops_polysperma.jpg)

Creative Commons Attribution 3.0 Unported

**Leotiomycetes:** *Uncinula tulasnei*

<http://de.wikipedia.org/w/index.php?title=Datei:UncinulaTulasneiDetail.jpg>

Creative Commons Attribution 3.0 Unported

**Orbiliomycetes:** *Orbilina sp.*

[http://pt.wikipedia.org/wiki/Ficheiro:Orbilina\\_spp.jpg](http://pt.wikipedia.org/wiki/Ficheiro:Orbilina_spp.jpg)

Creative Commons Attribution 3.0 Unported

**Entomophthorales:** *Entomophthora muscae*

[http://en.wikipedia.org/wiki/File:Entomophthora\\_muscae\\_on\\_Scathophaga\\_stercoraria\\_%28lateral\\_view%29.jpg](http://en.wikipedia.org/wiki/File:Entomophthora_muscae_on_Scathophaga_stercoraria_%28lateral_view%29.jpg)

Creative Commons Attribution 3.0 Unported

**Blastocladiomycota:** *Blastocladiella simplex*

<http://www.flickr.com/photos/stajich/3576652039/in/pool-806927@N20/>

Attribution-NonCommercial-ShareAlike 2.0 Generic

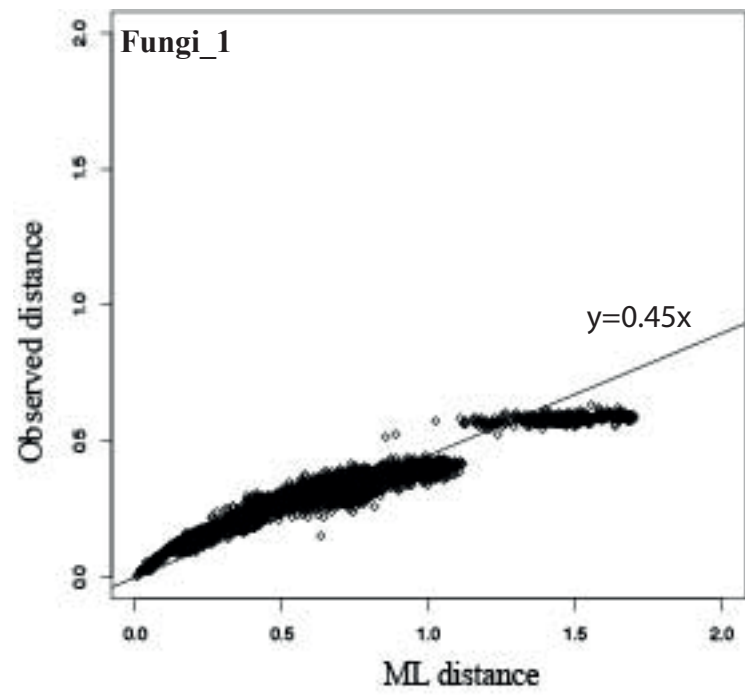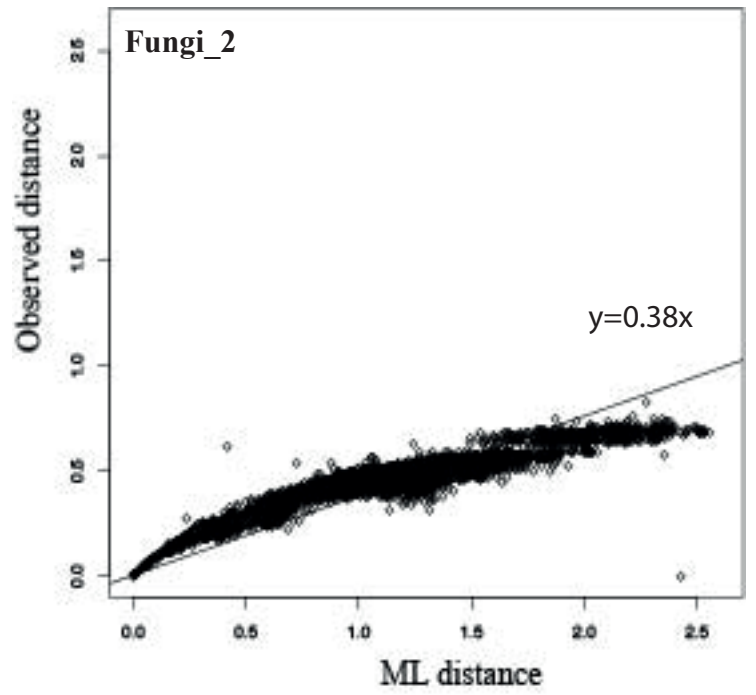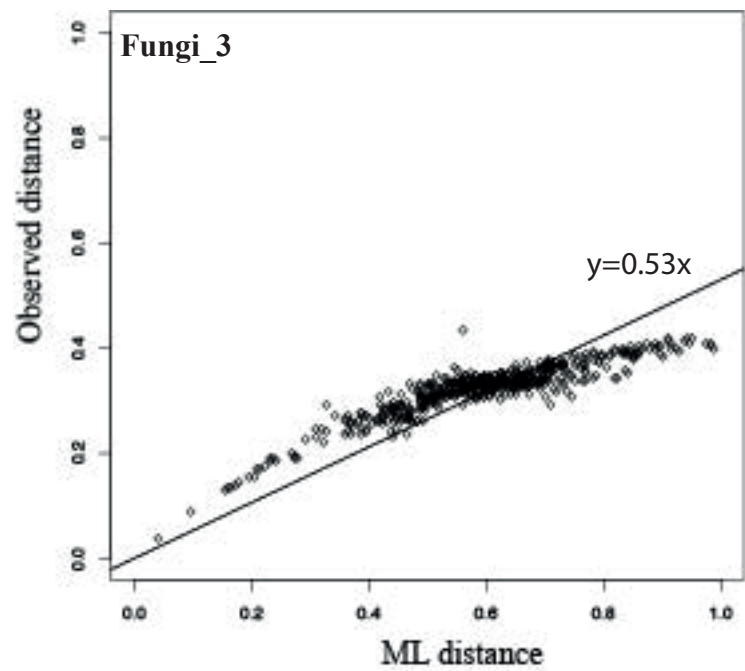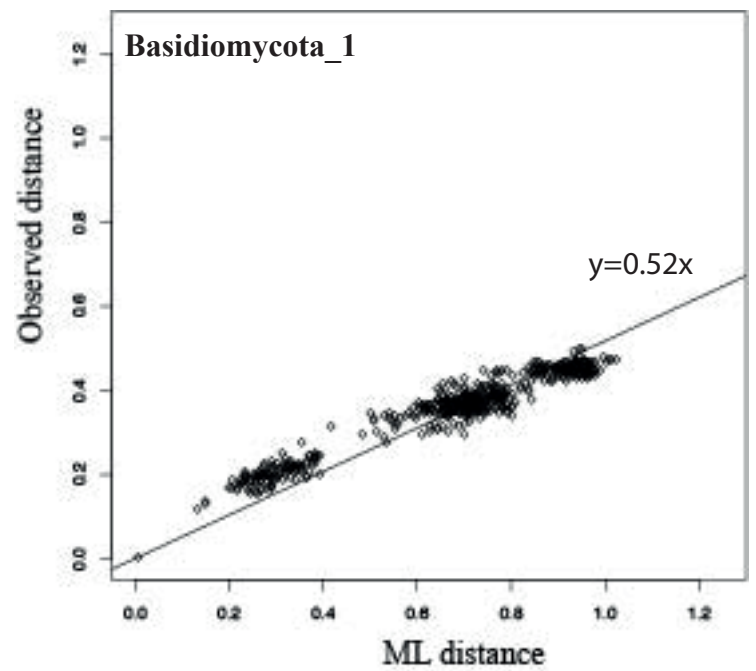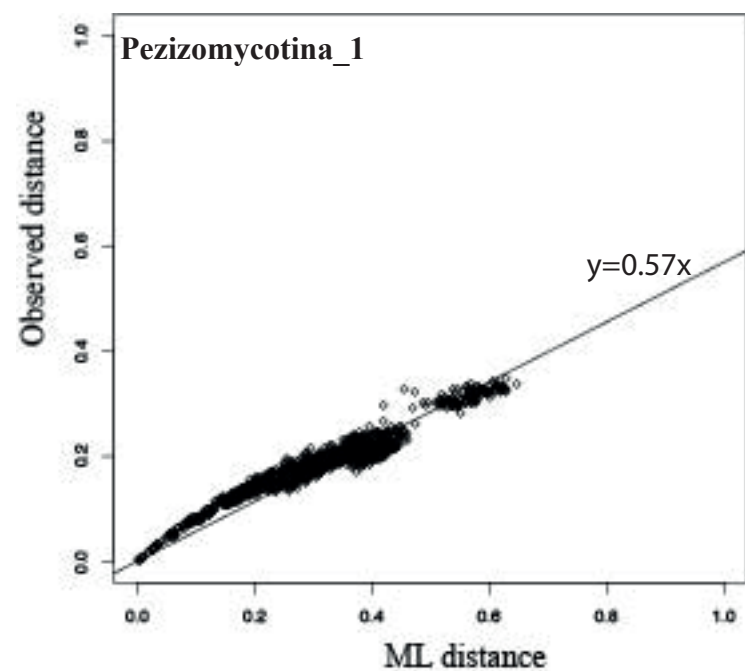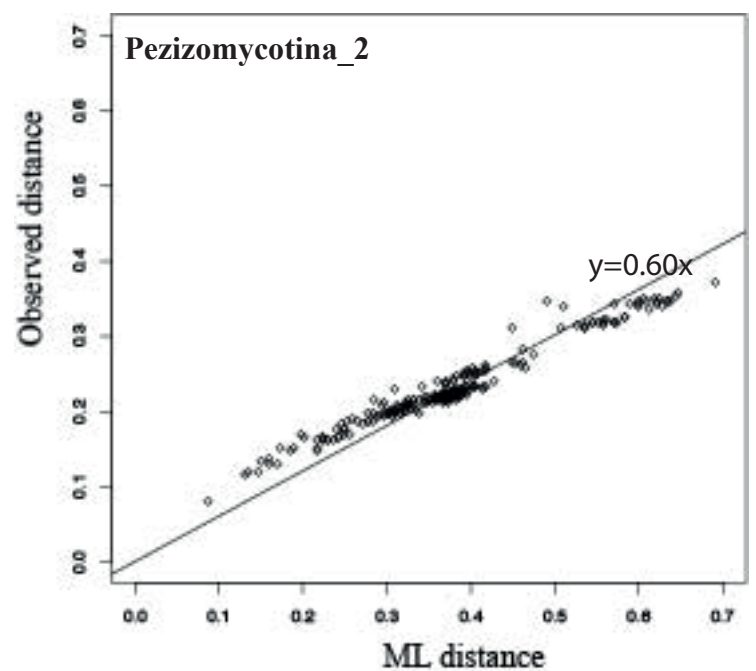

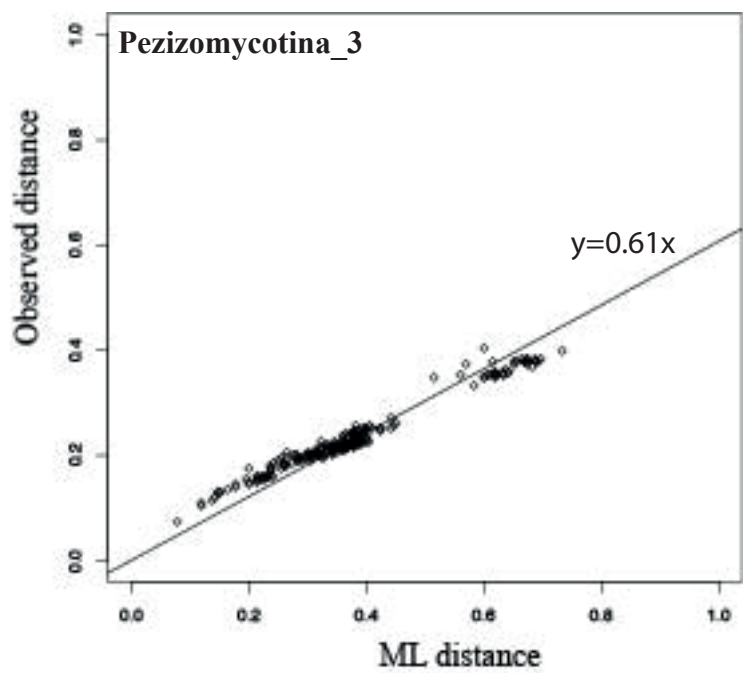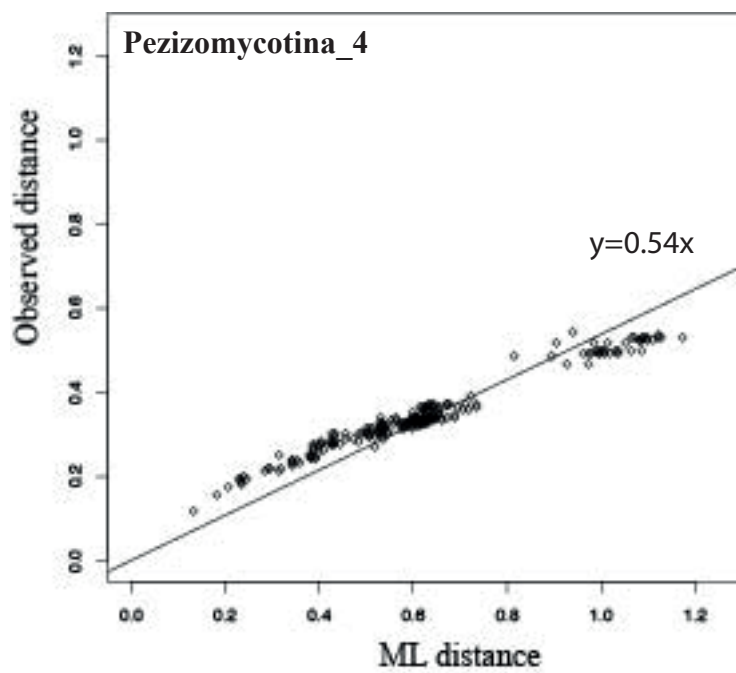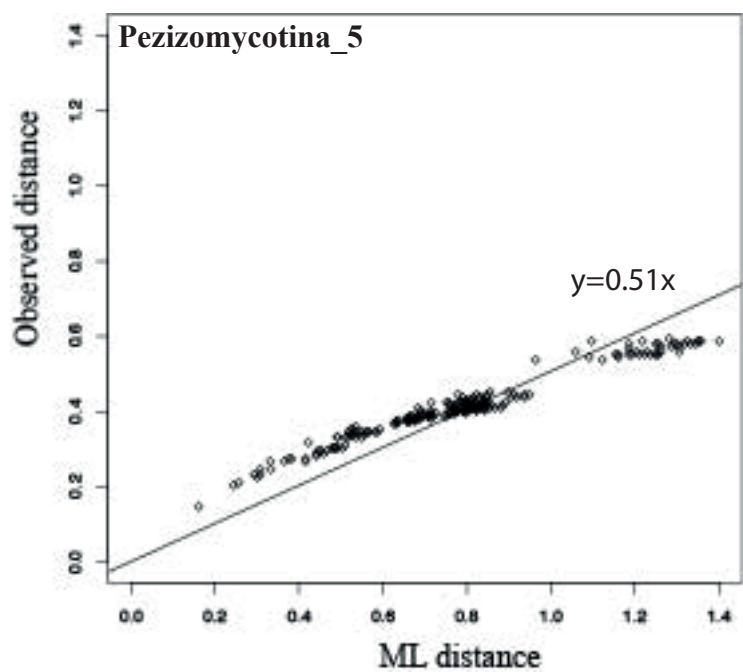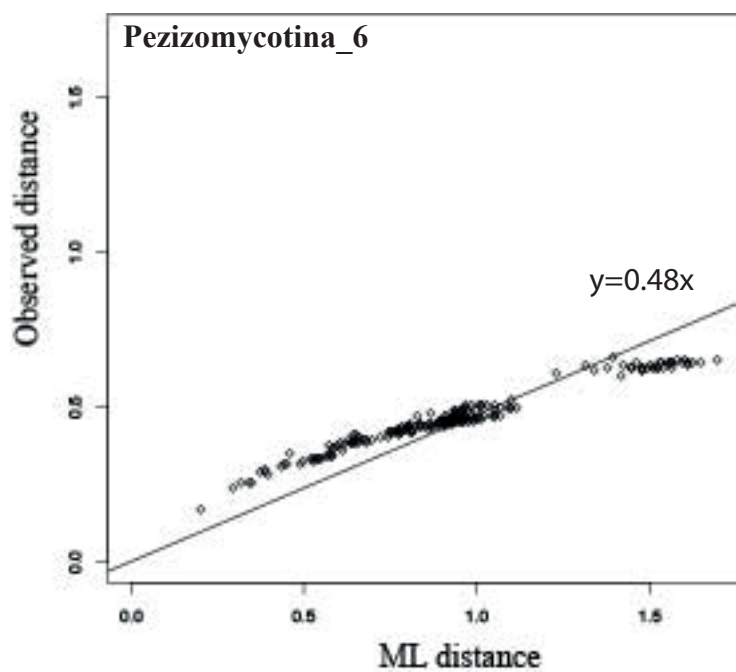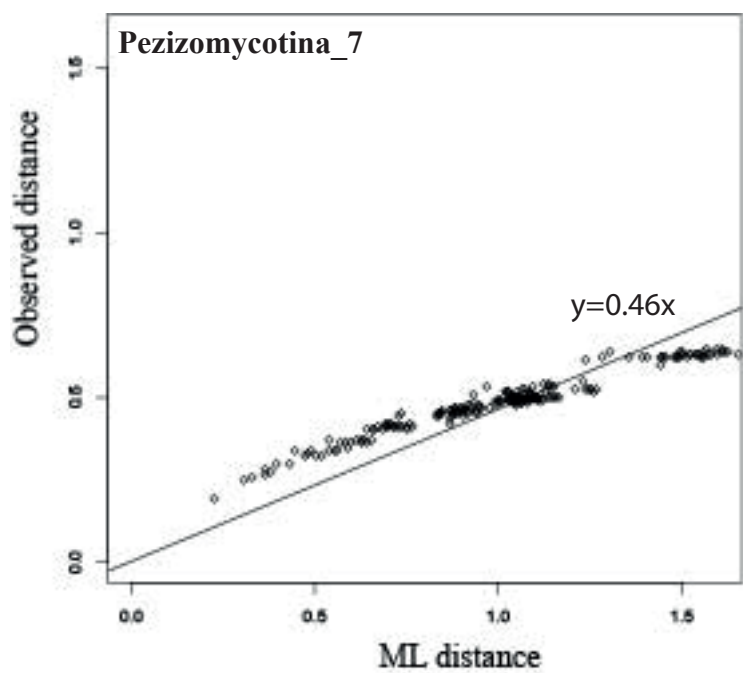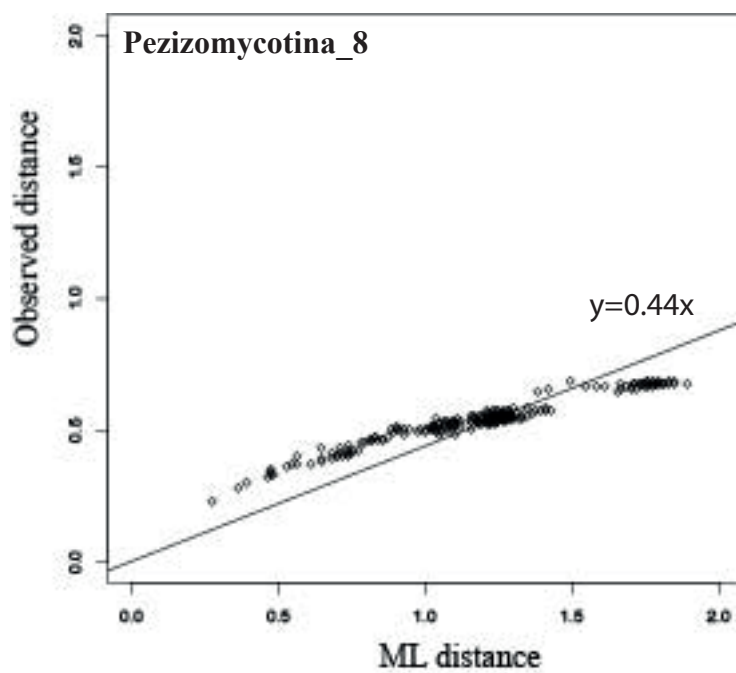

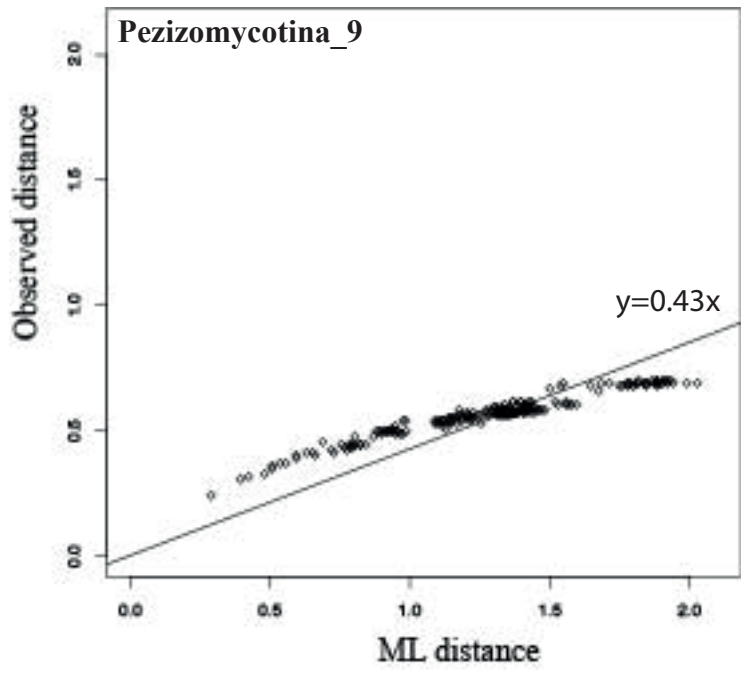

**A**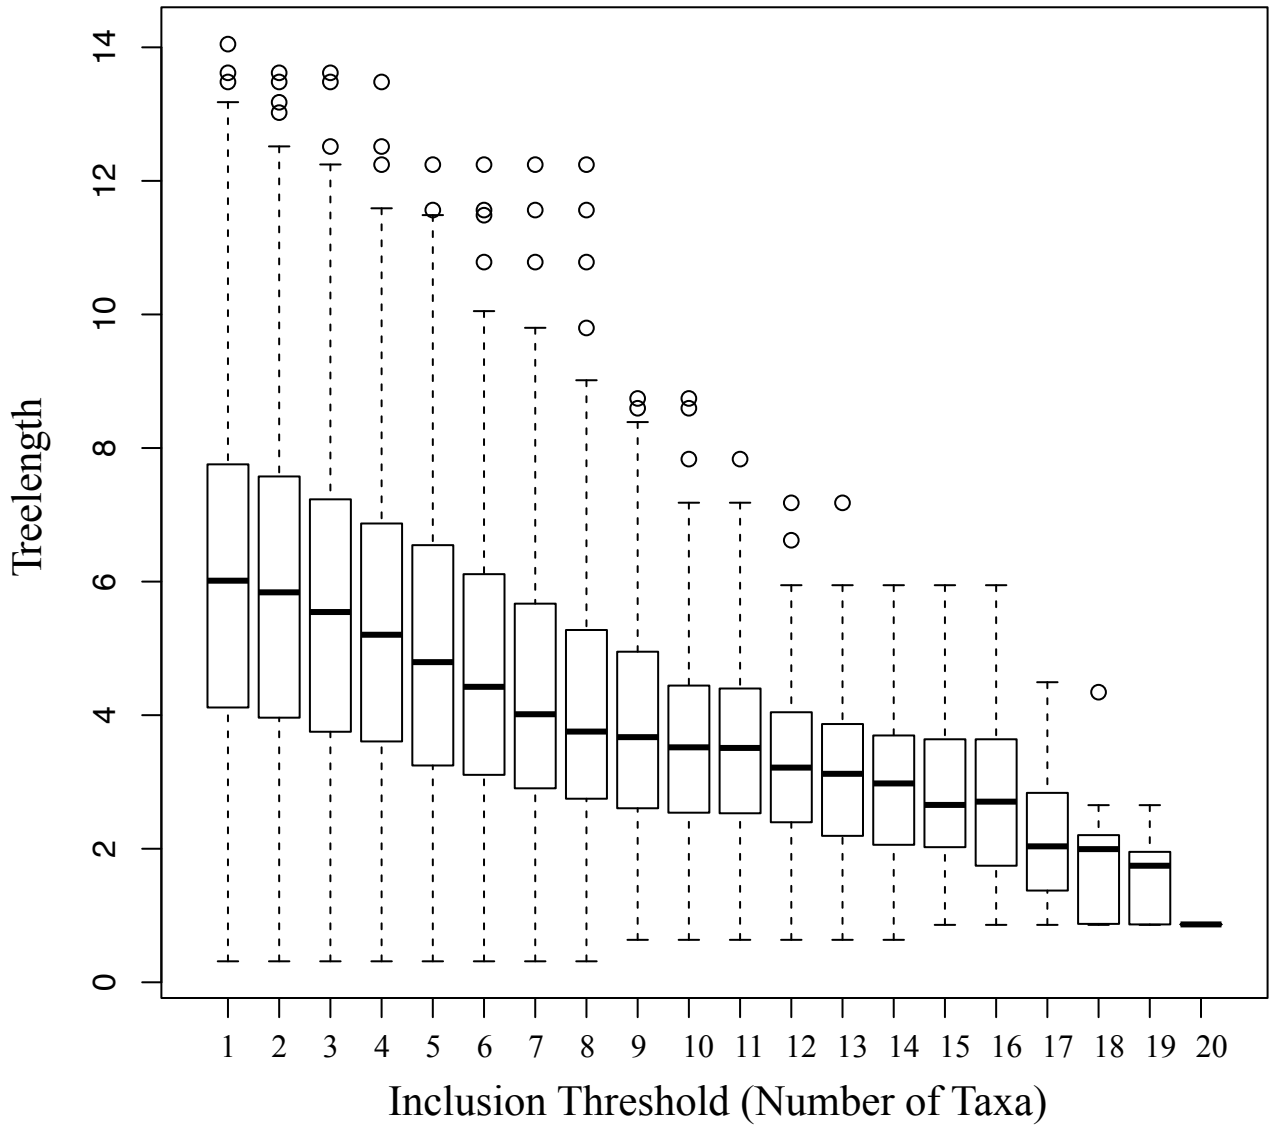**B**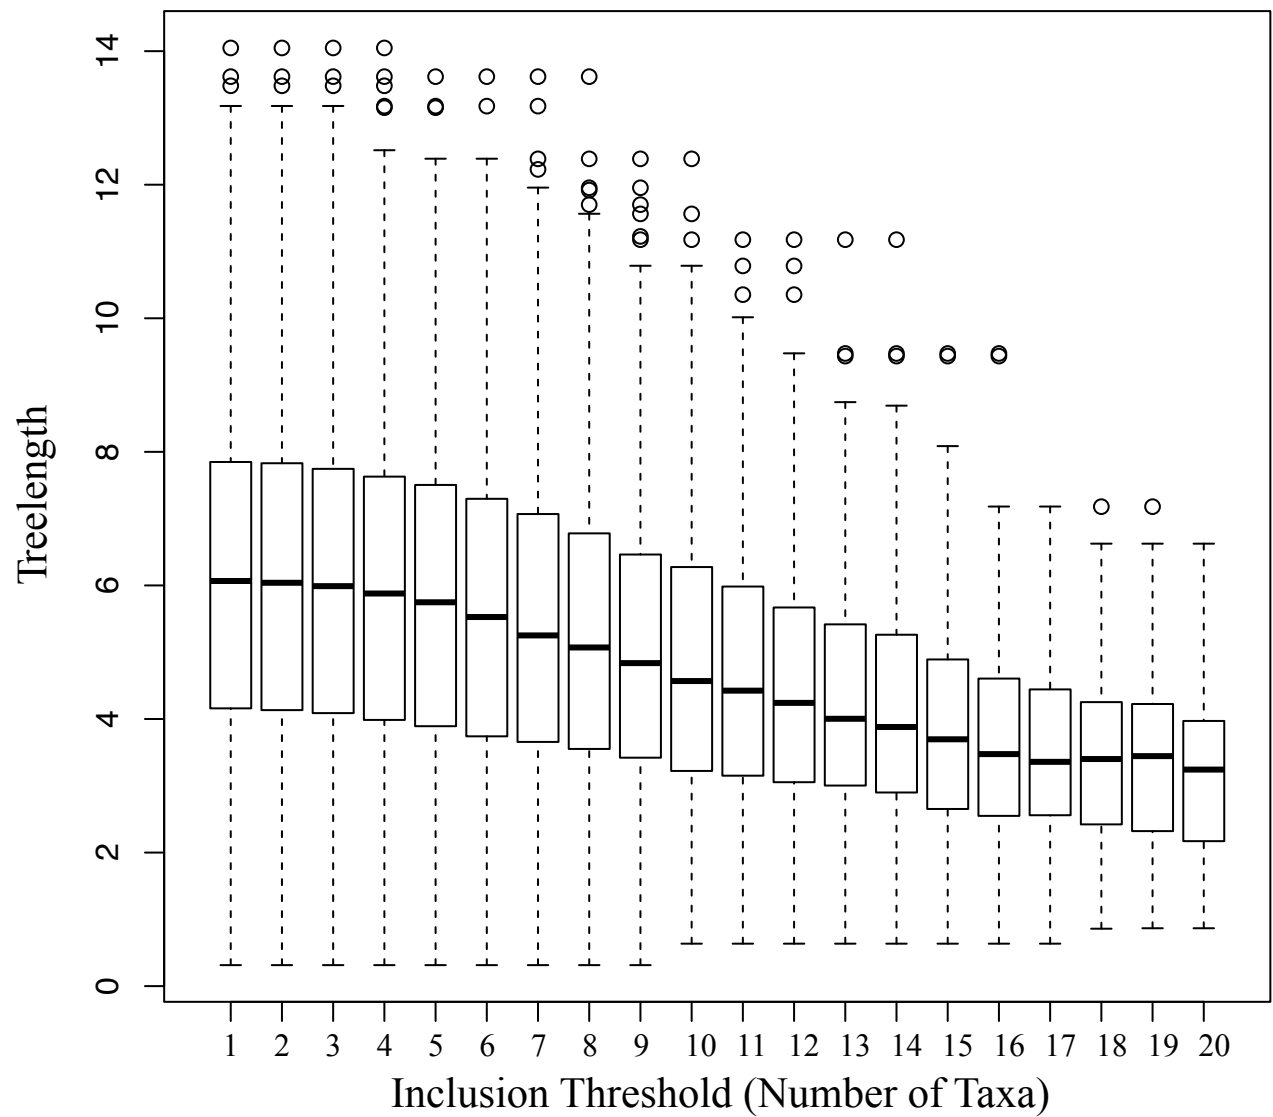

Supplementary Fig. S3

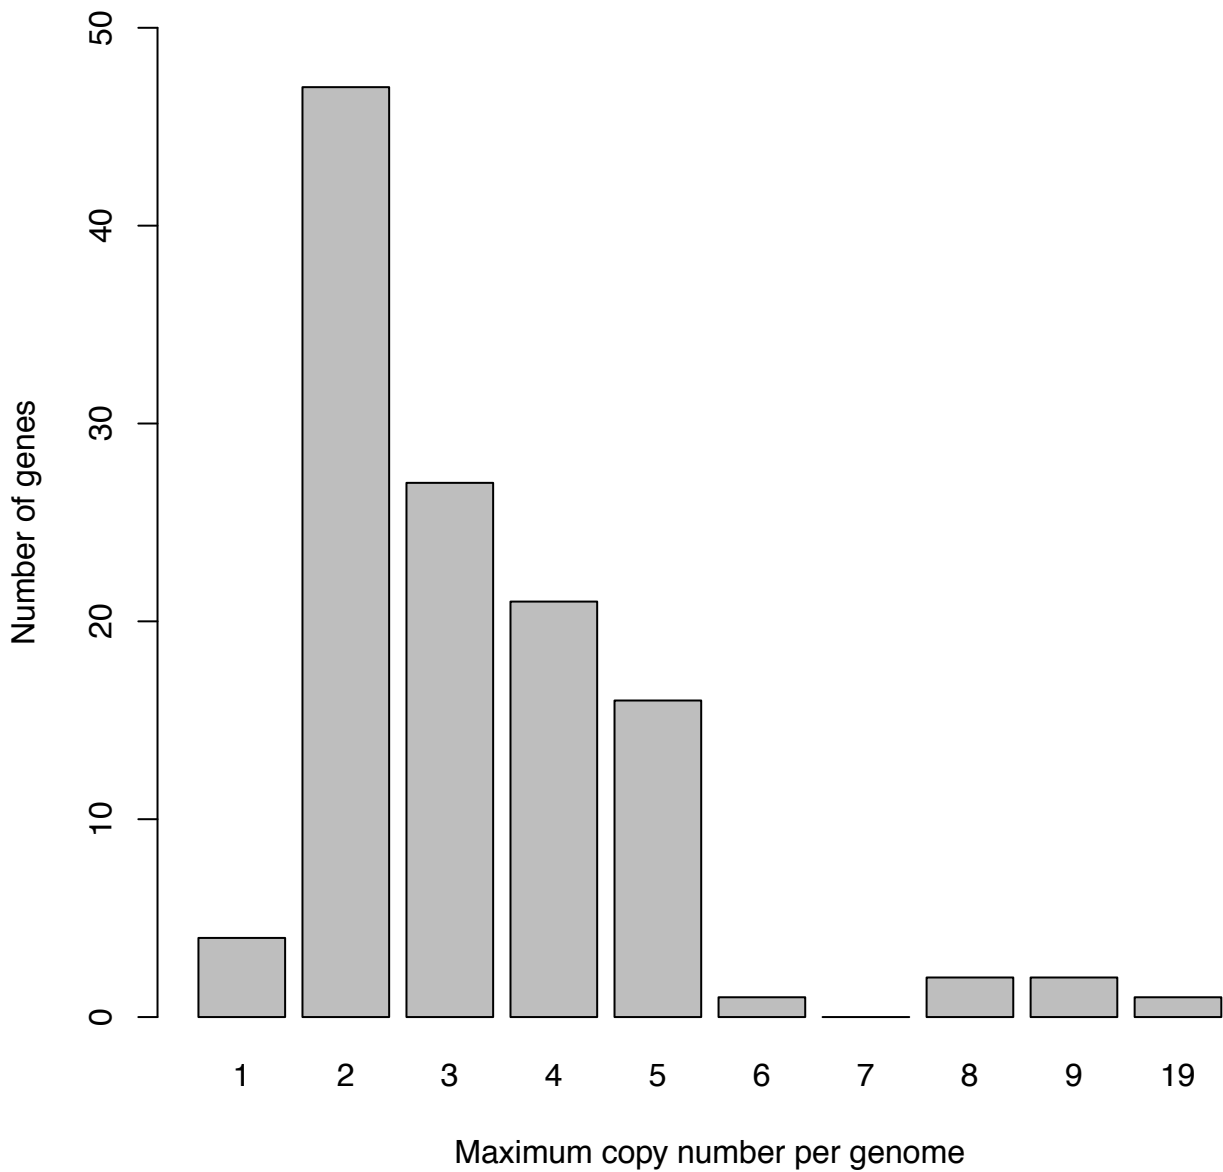

Supplementary Fig. S5A

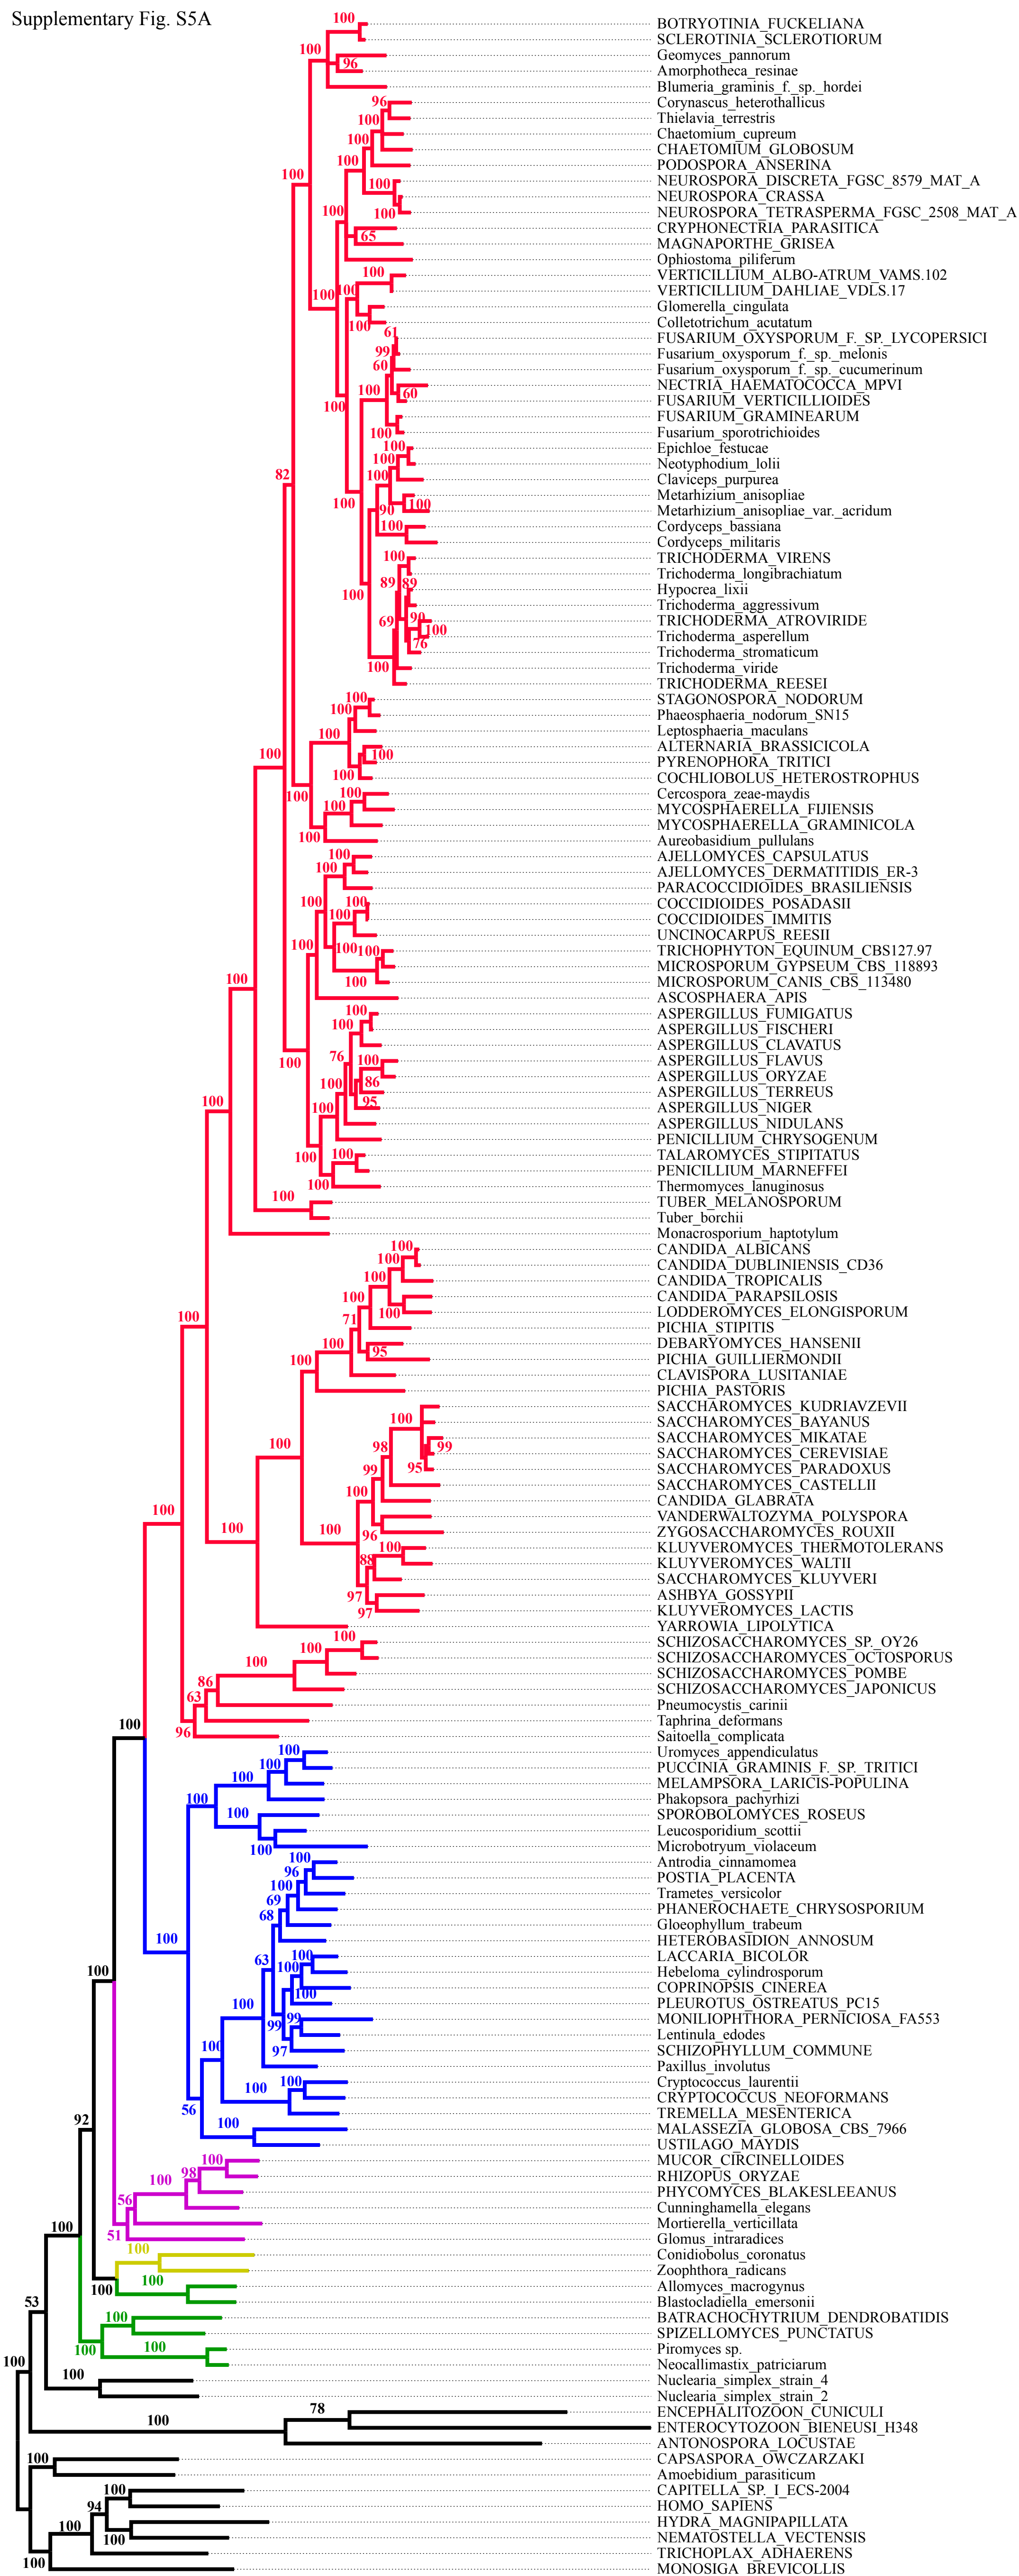

Supplementary Fig. S5B

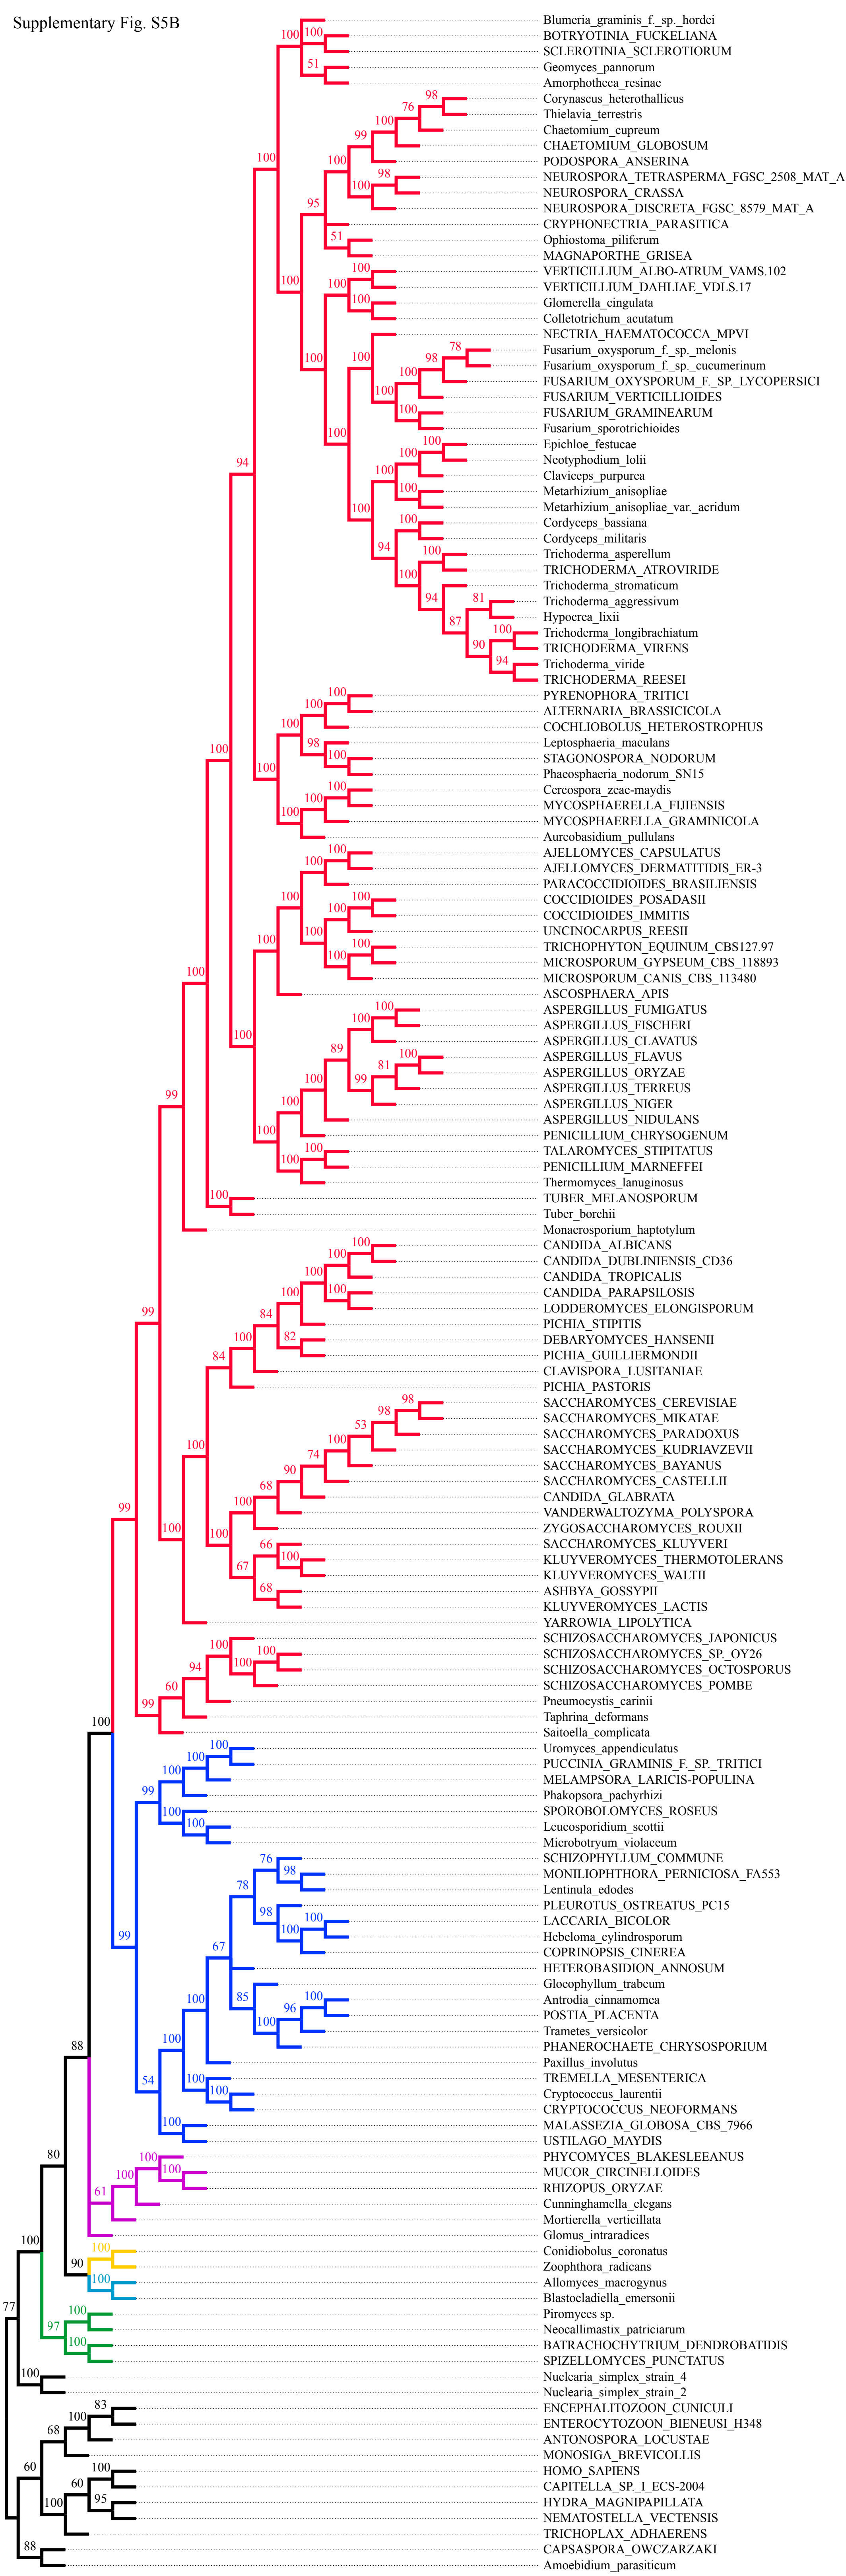



Supplementary Fig. S5C

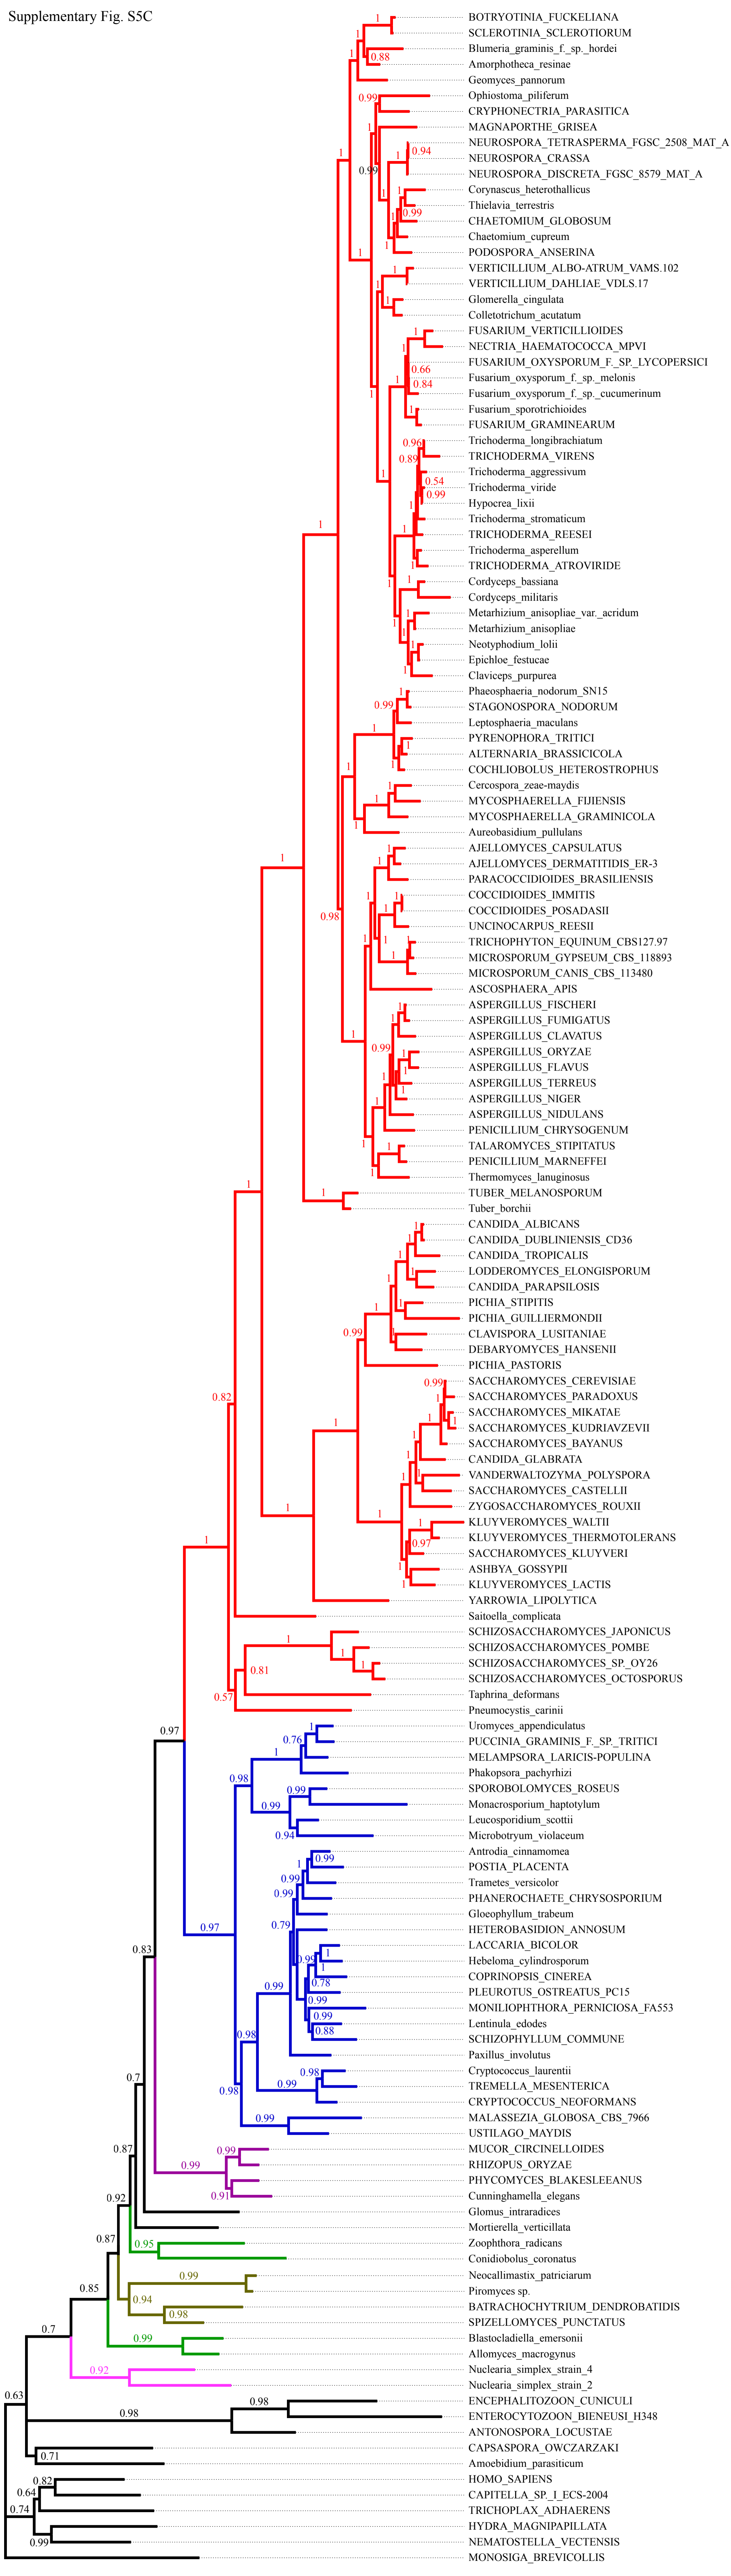

Supplementary Fig. S5D

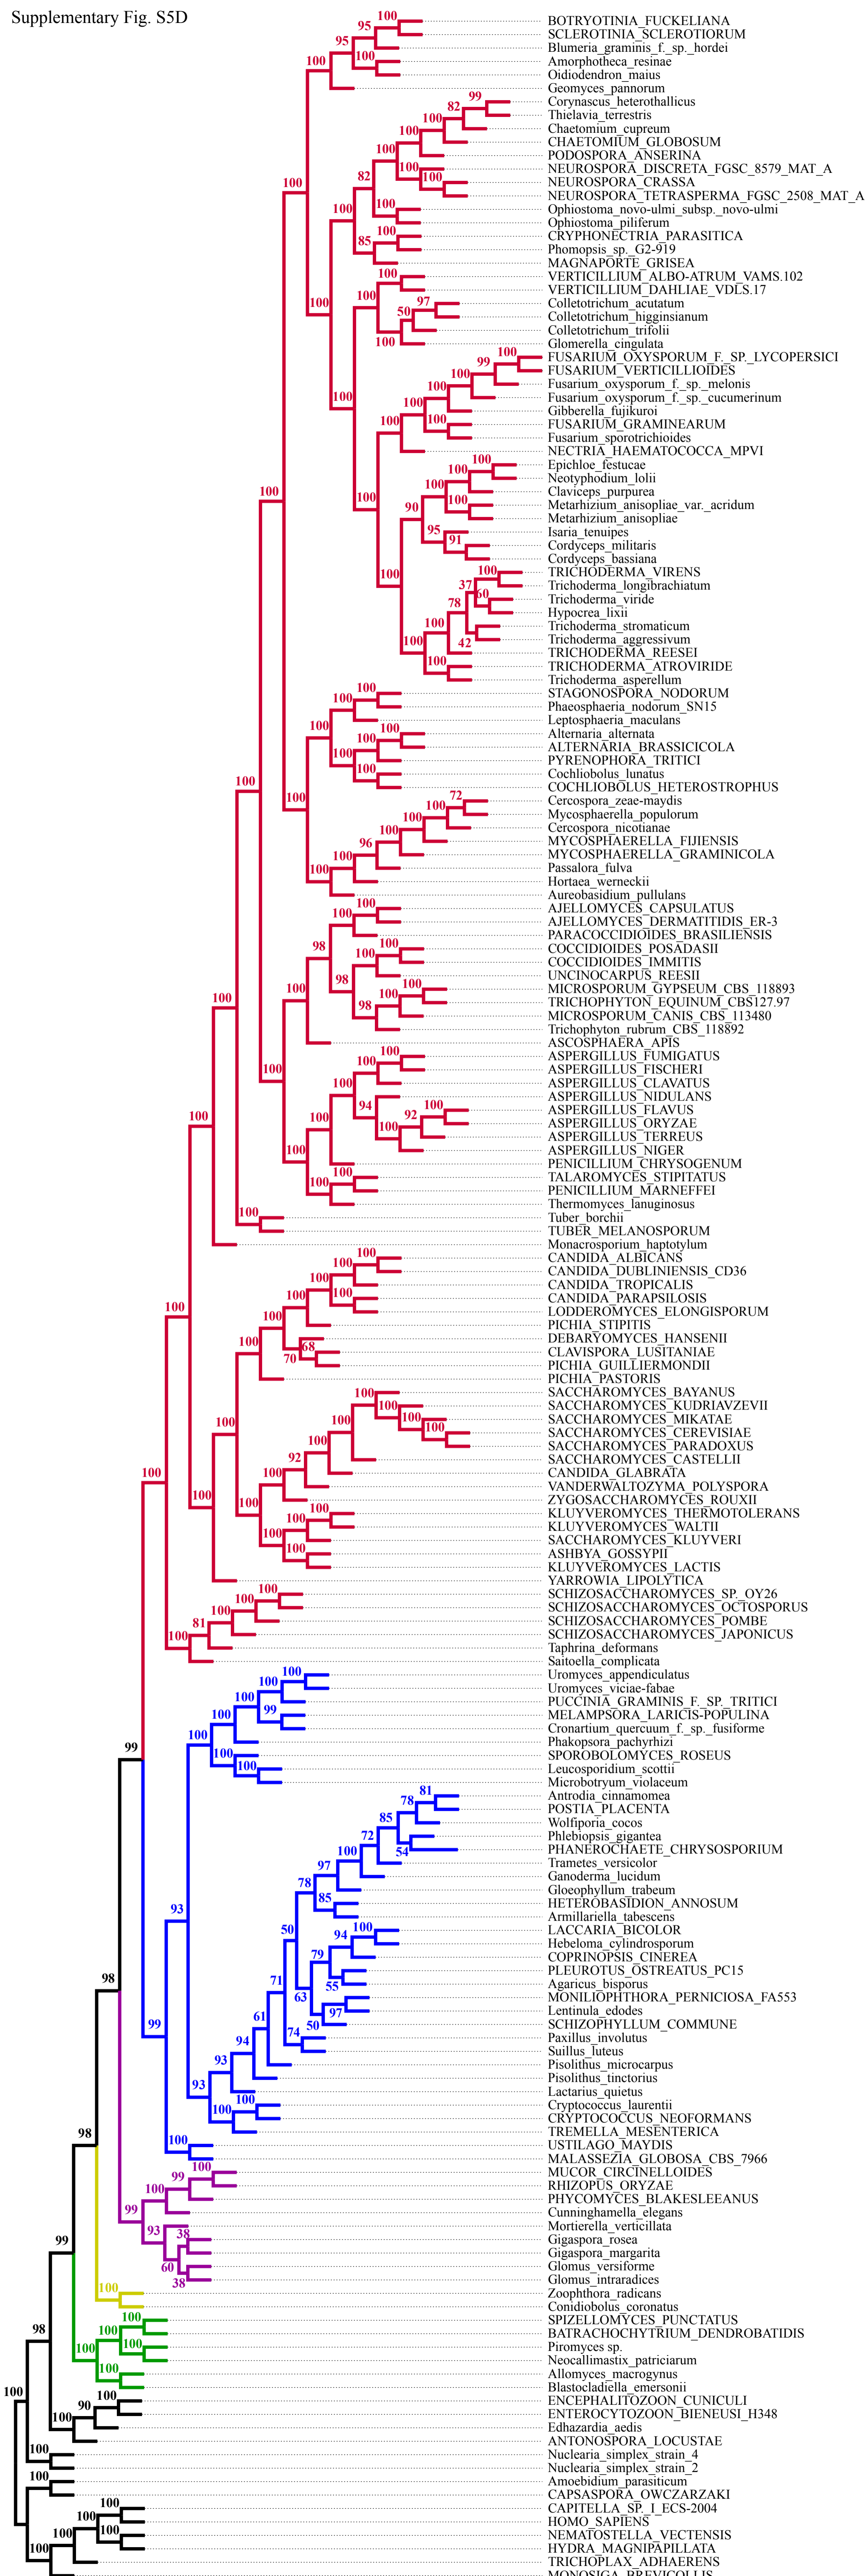

Supplementary Fig. S6A

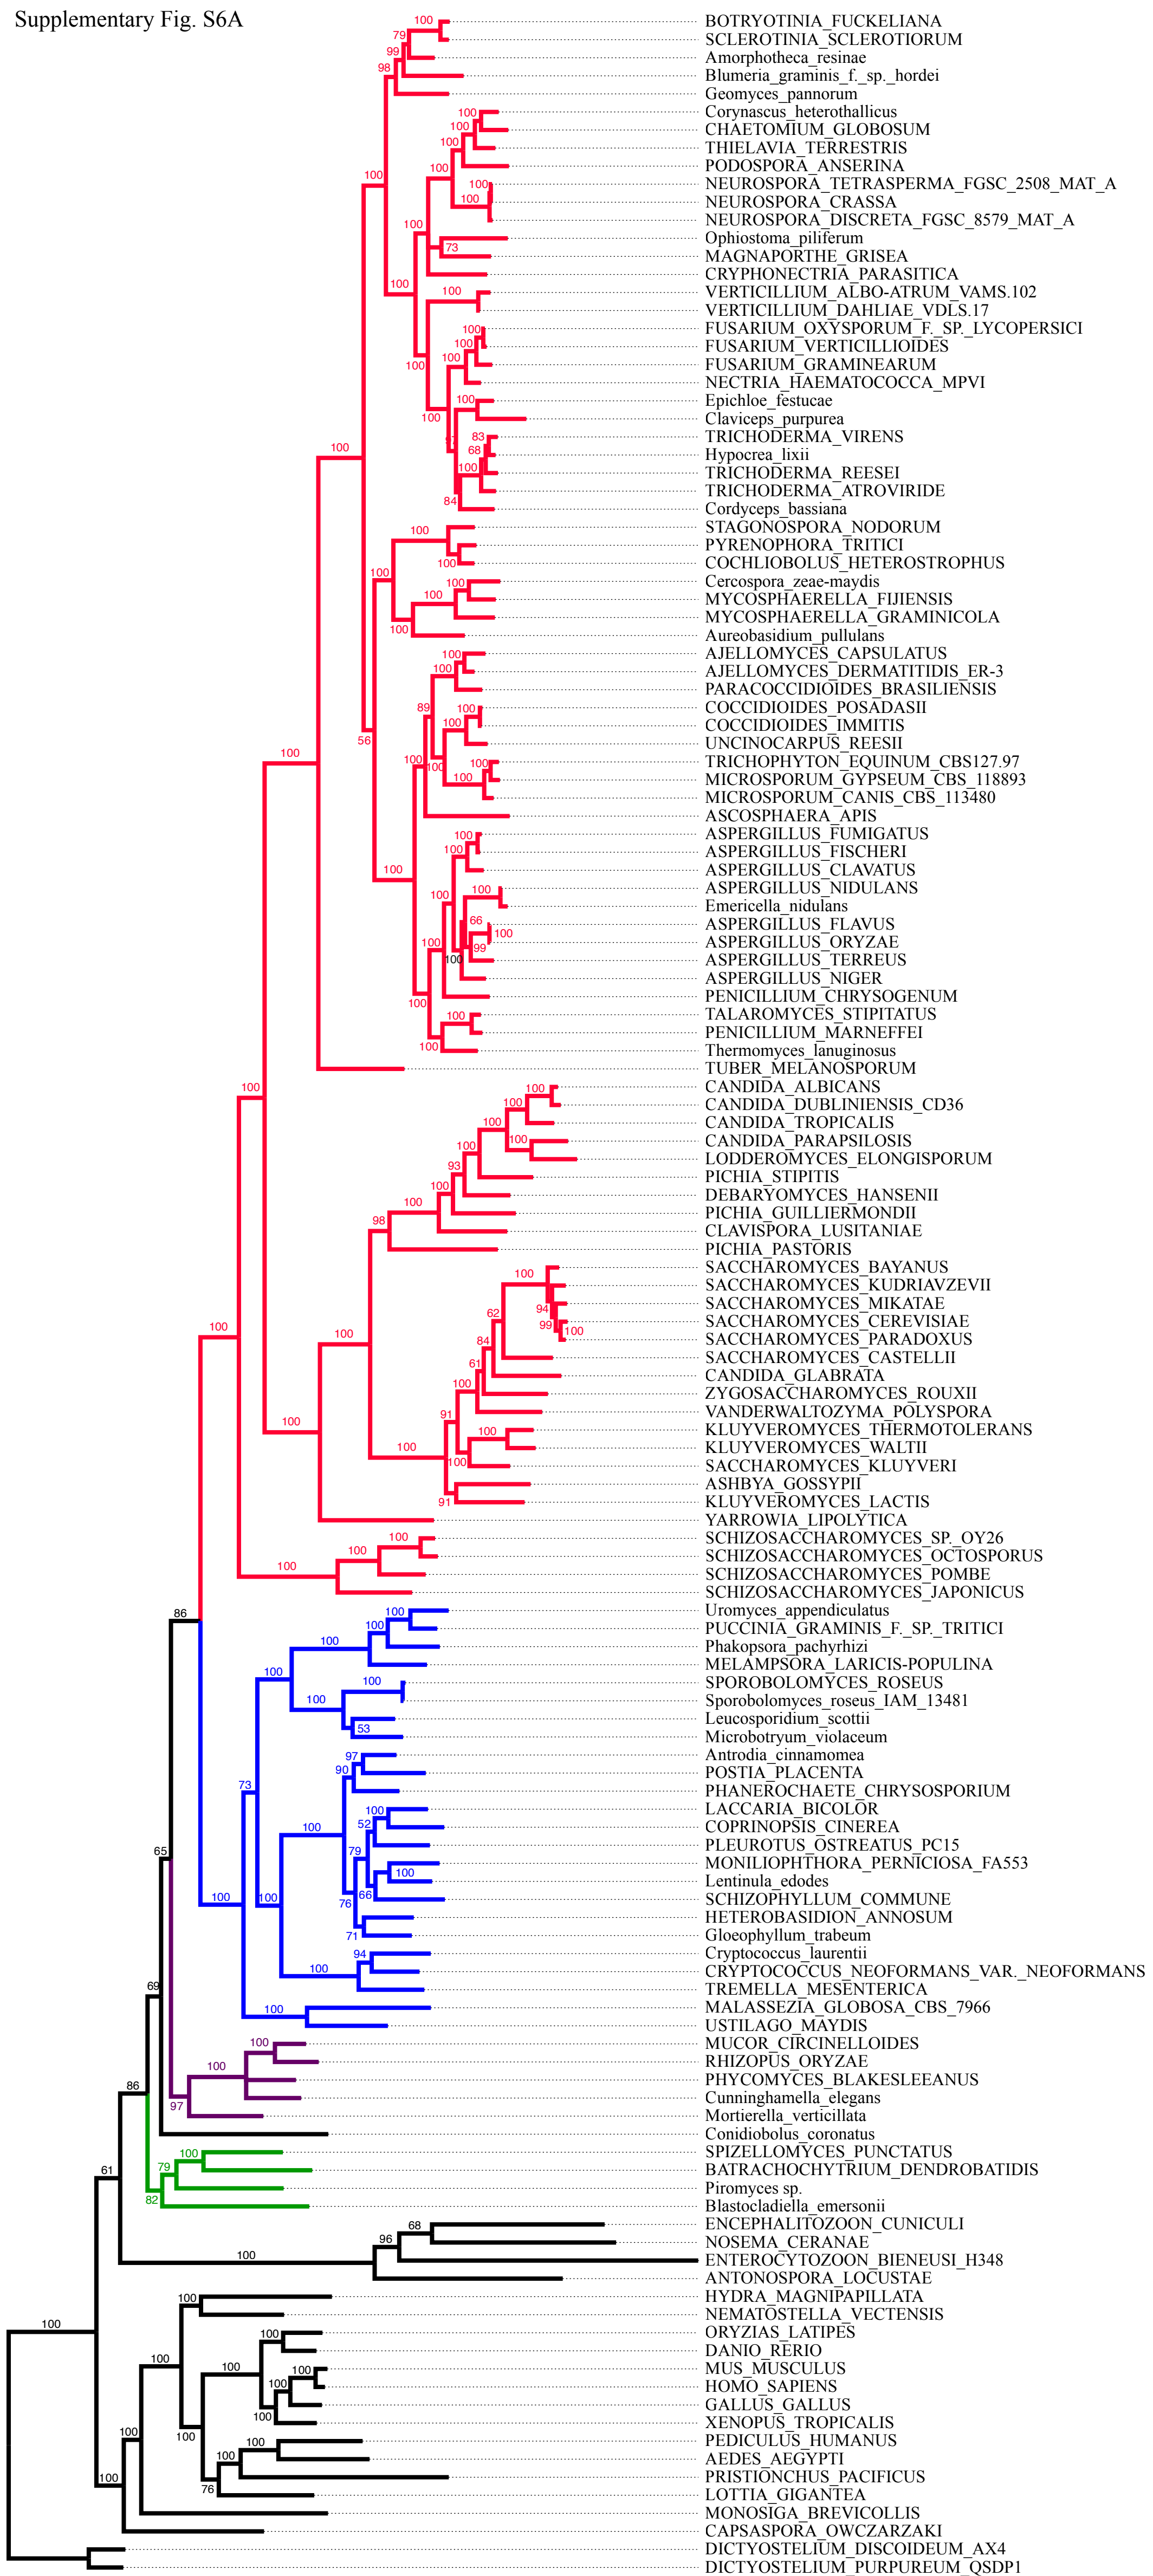

Supplementary Fig. S6B

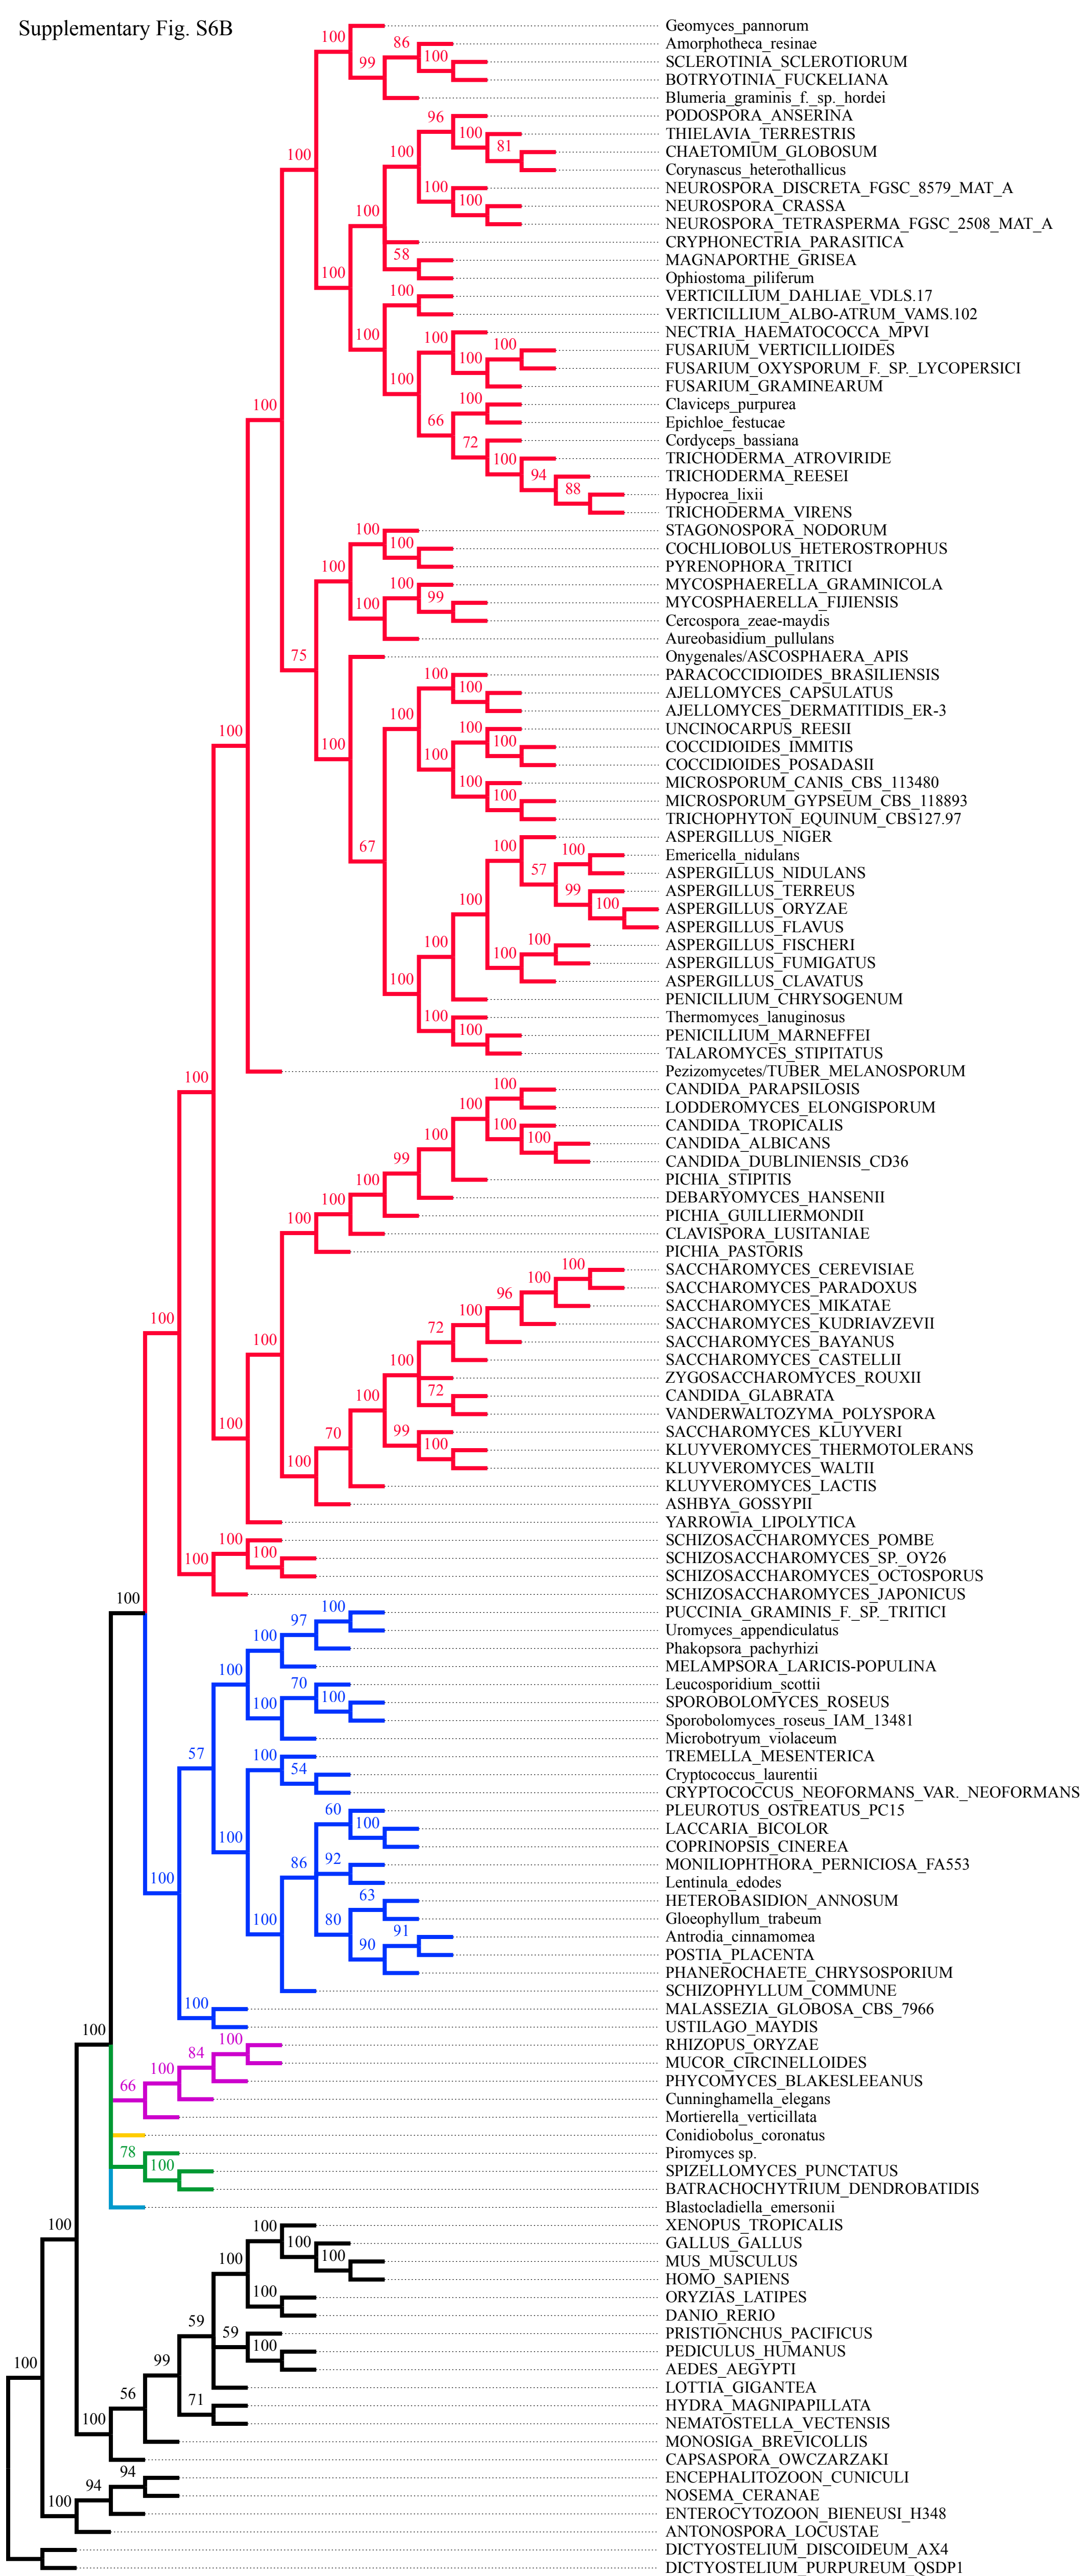

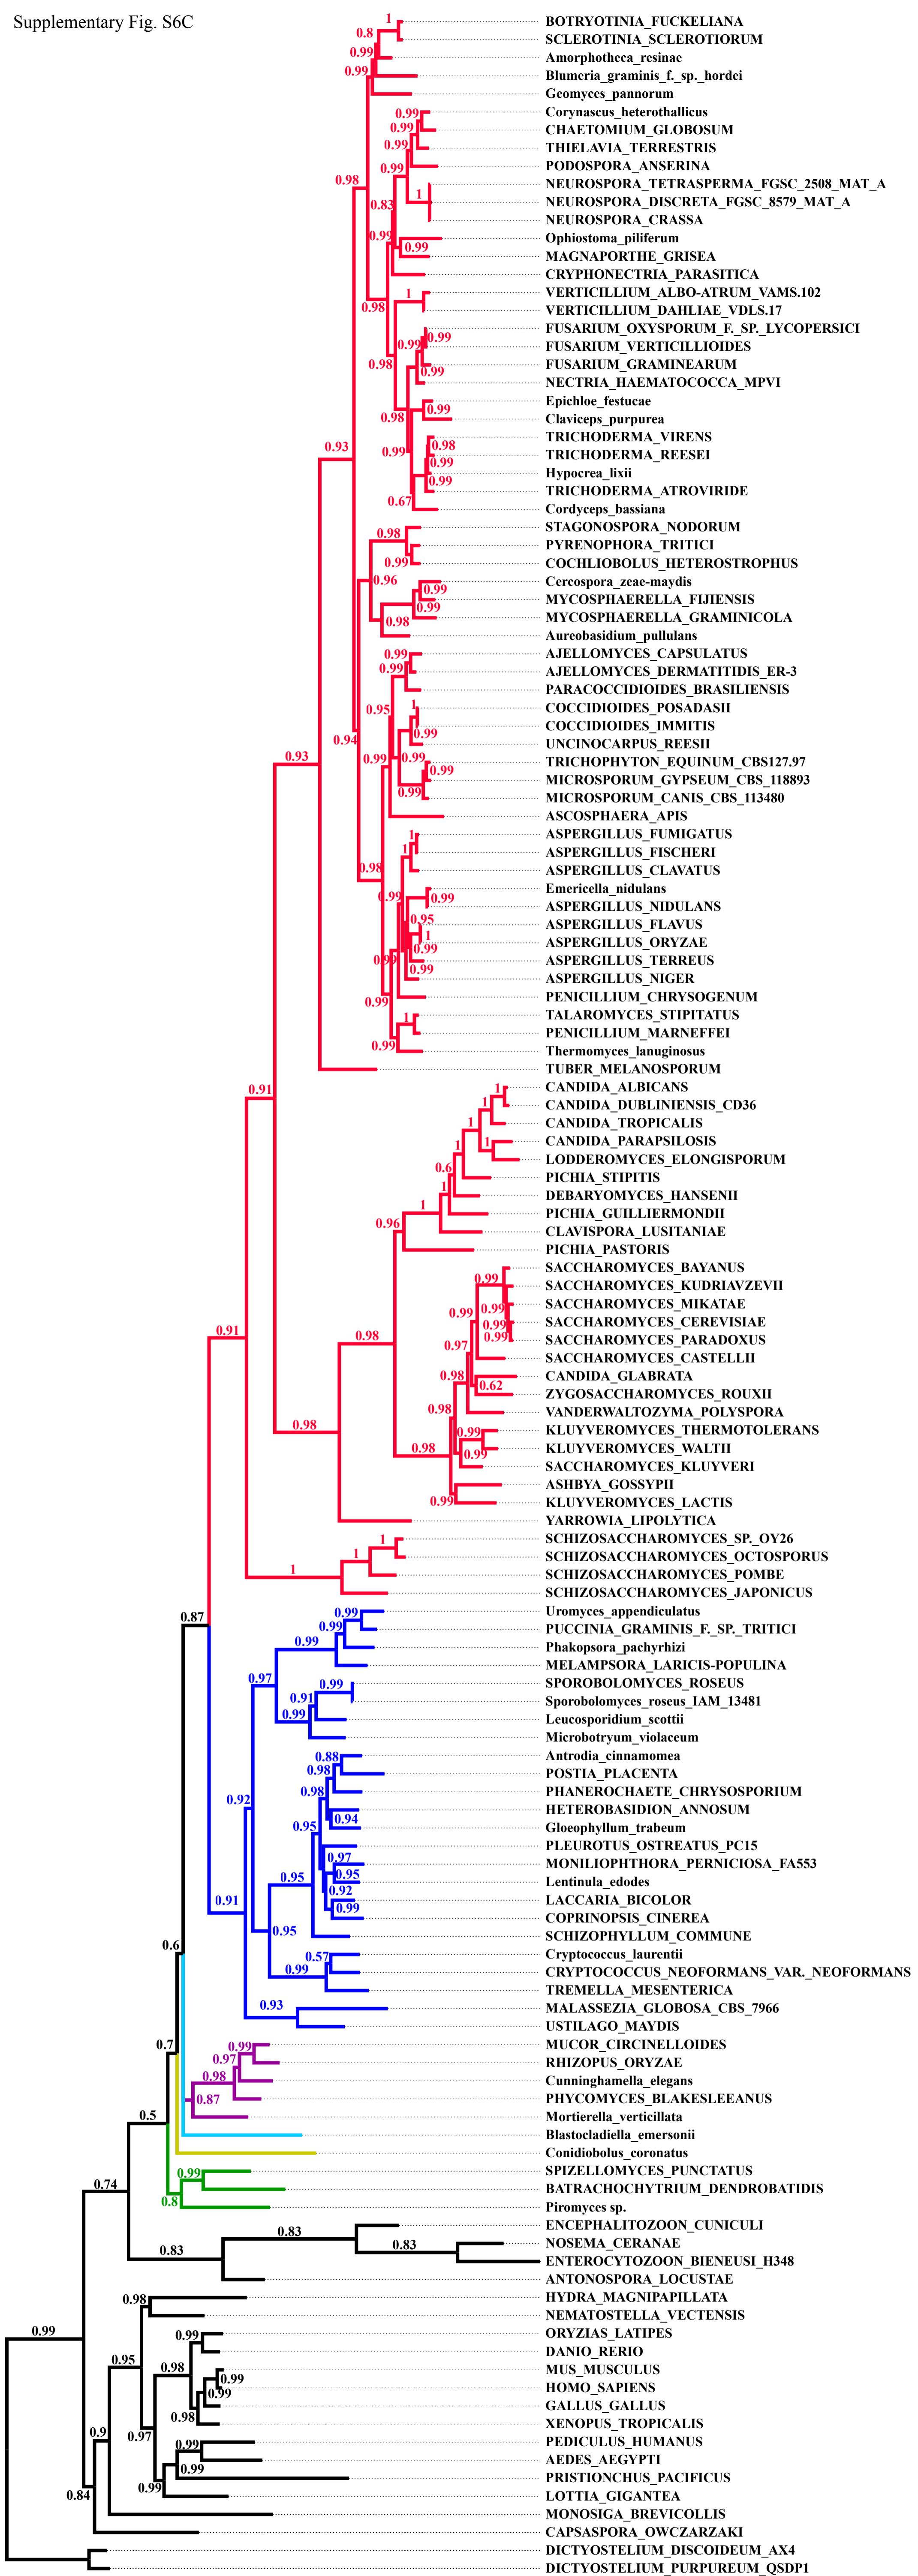

Supplementary Fig. S6D

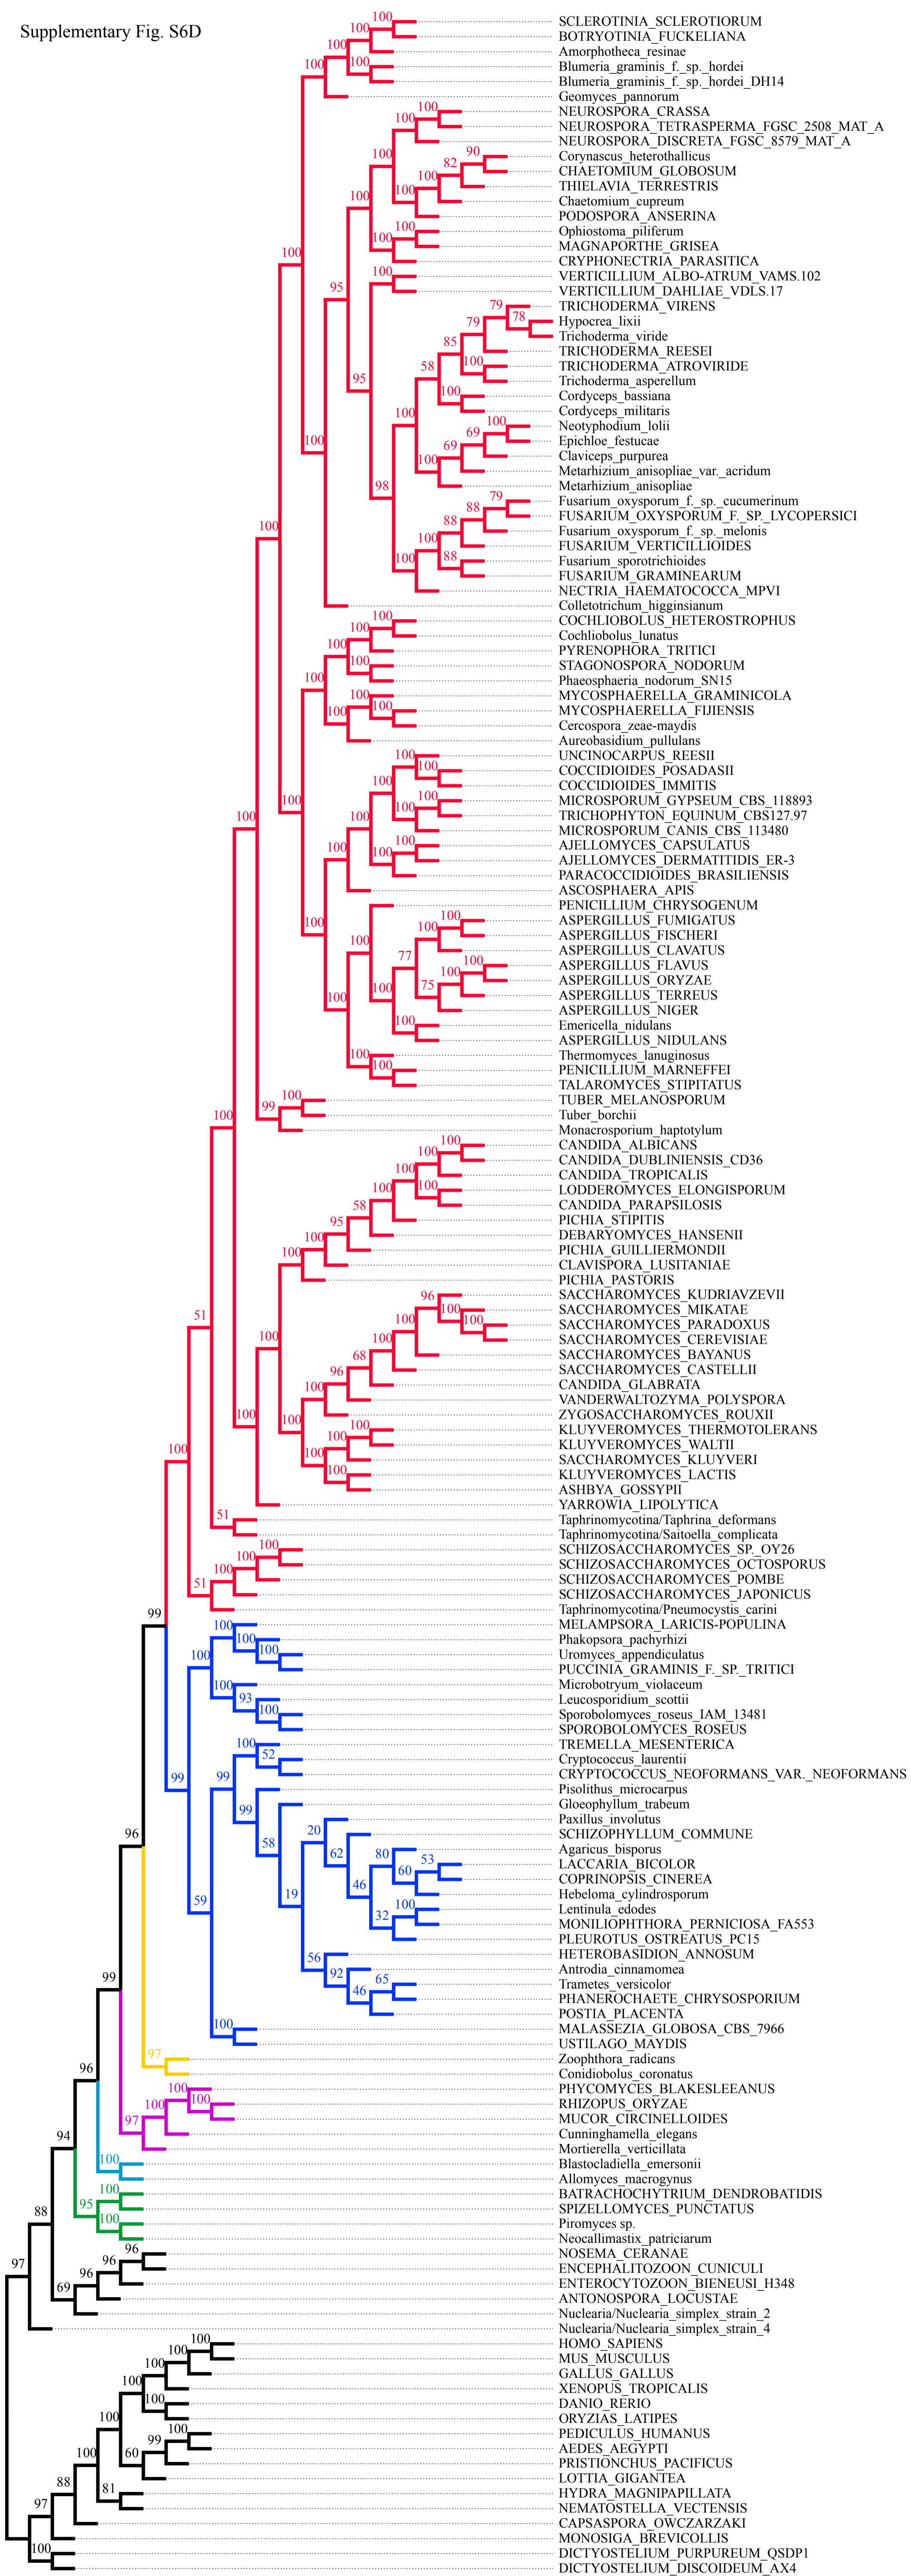

Supplementary Fig. S7A

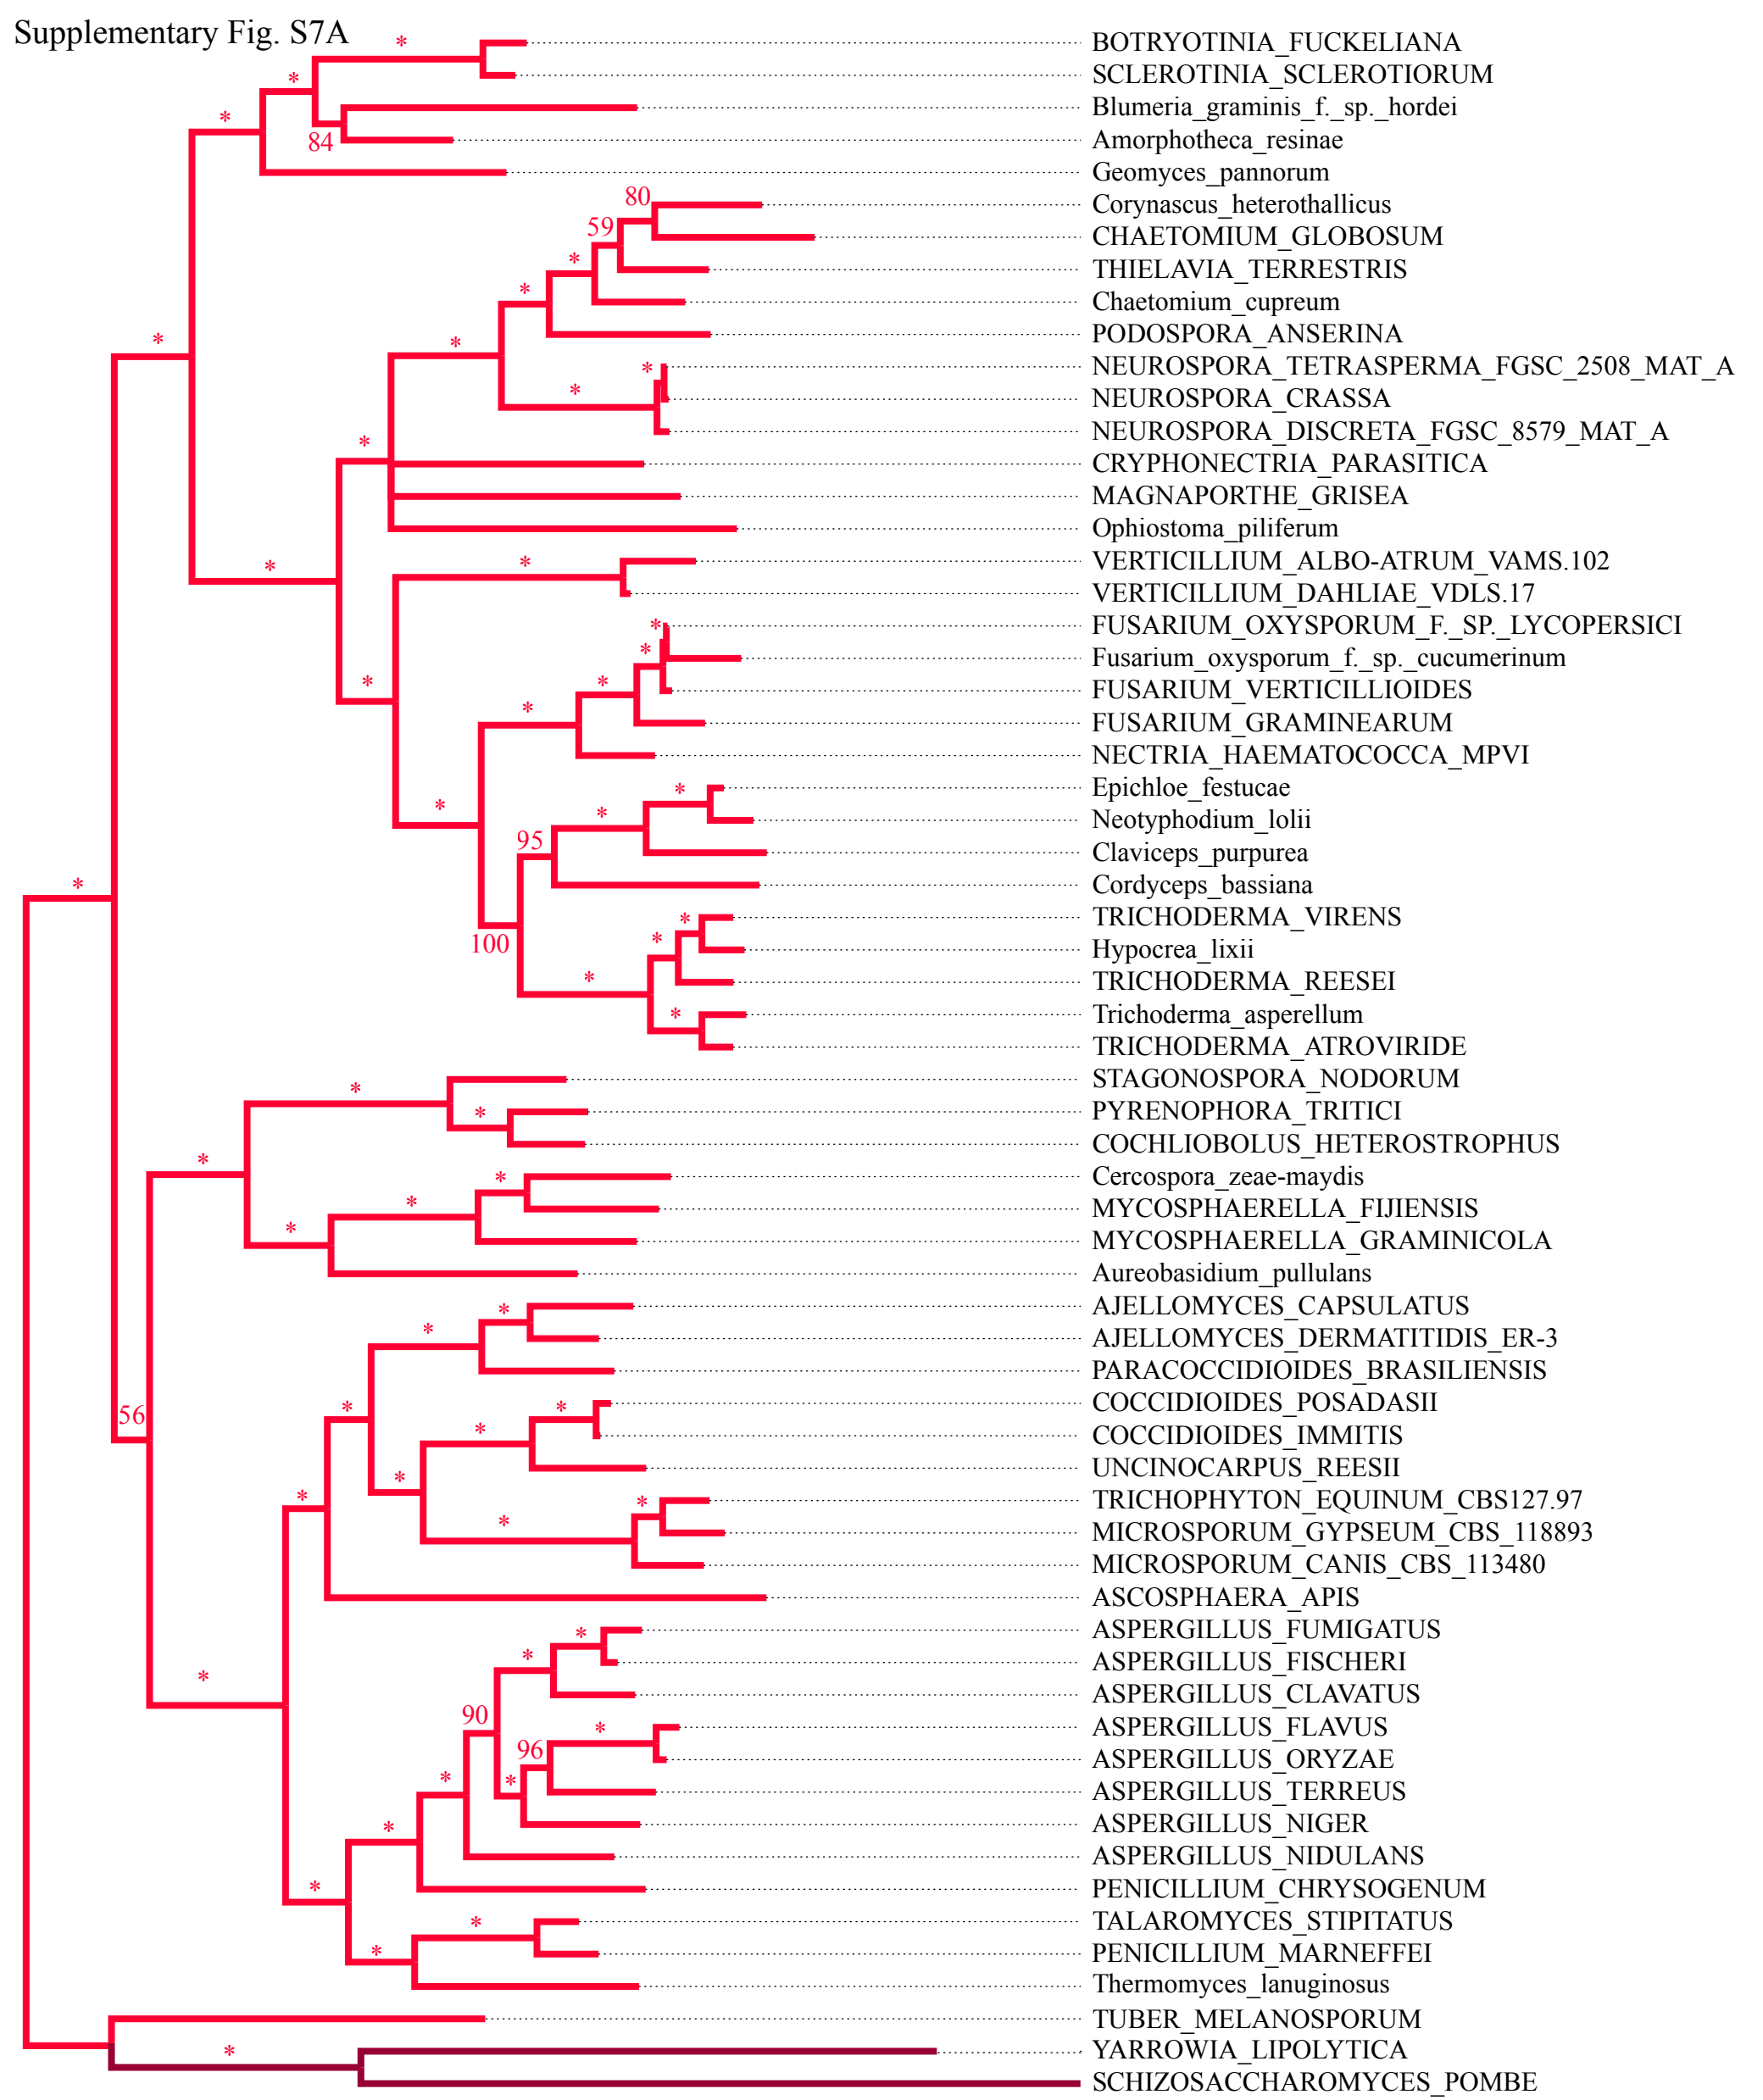

0.04

Supplementary Fig. S7B

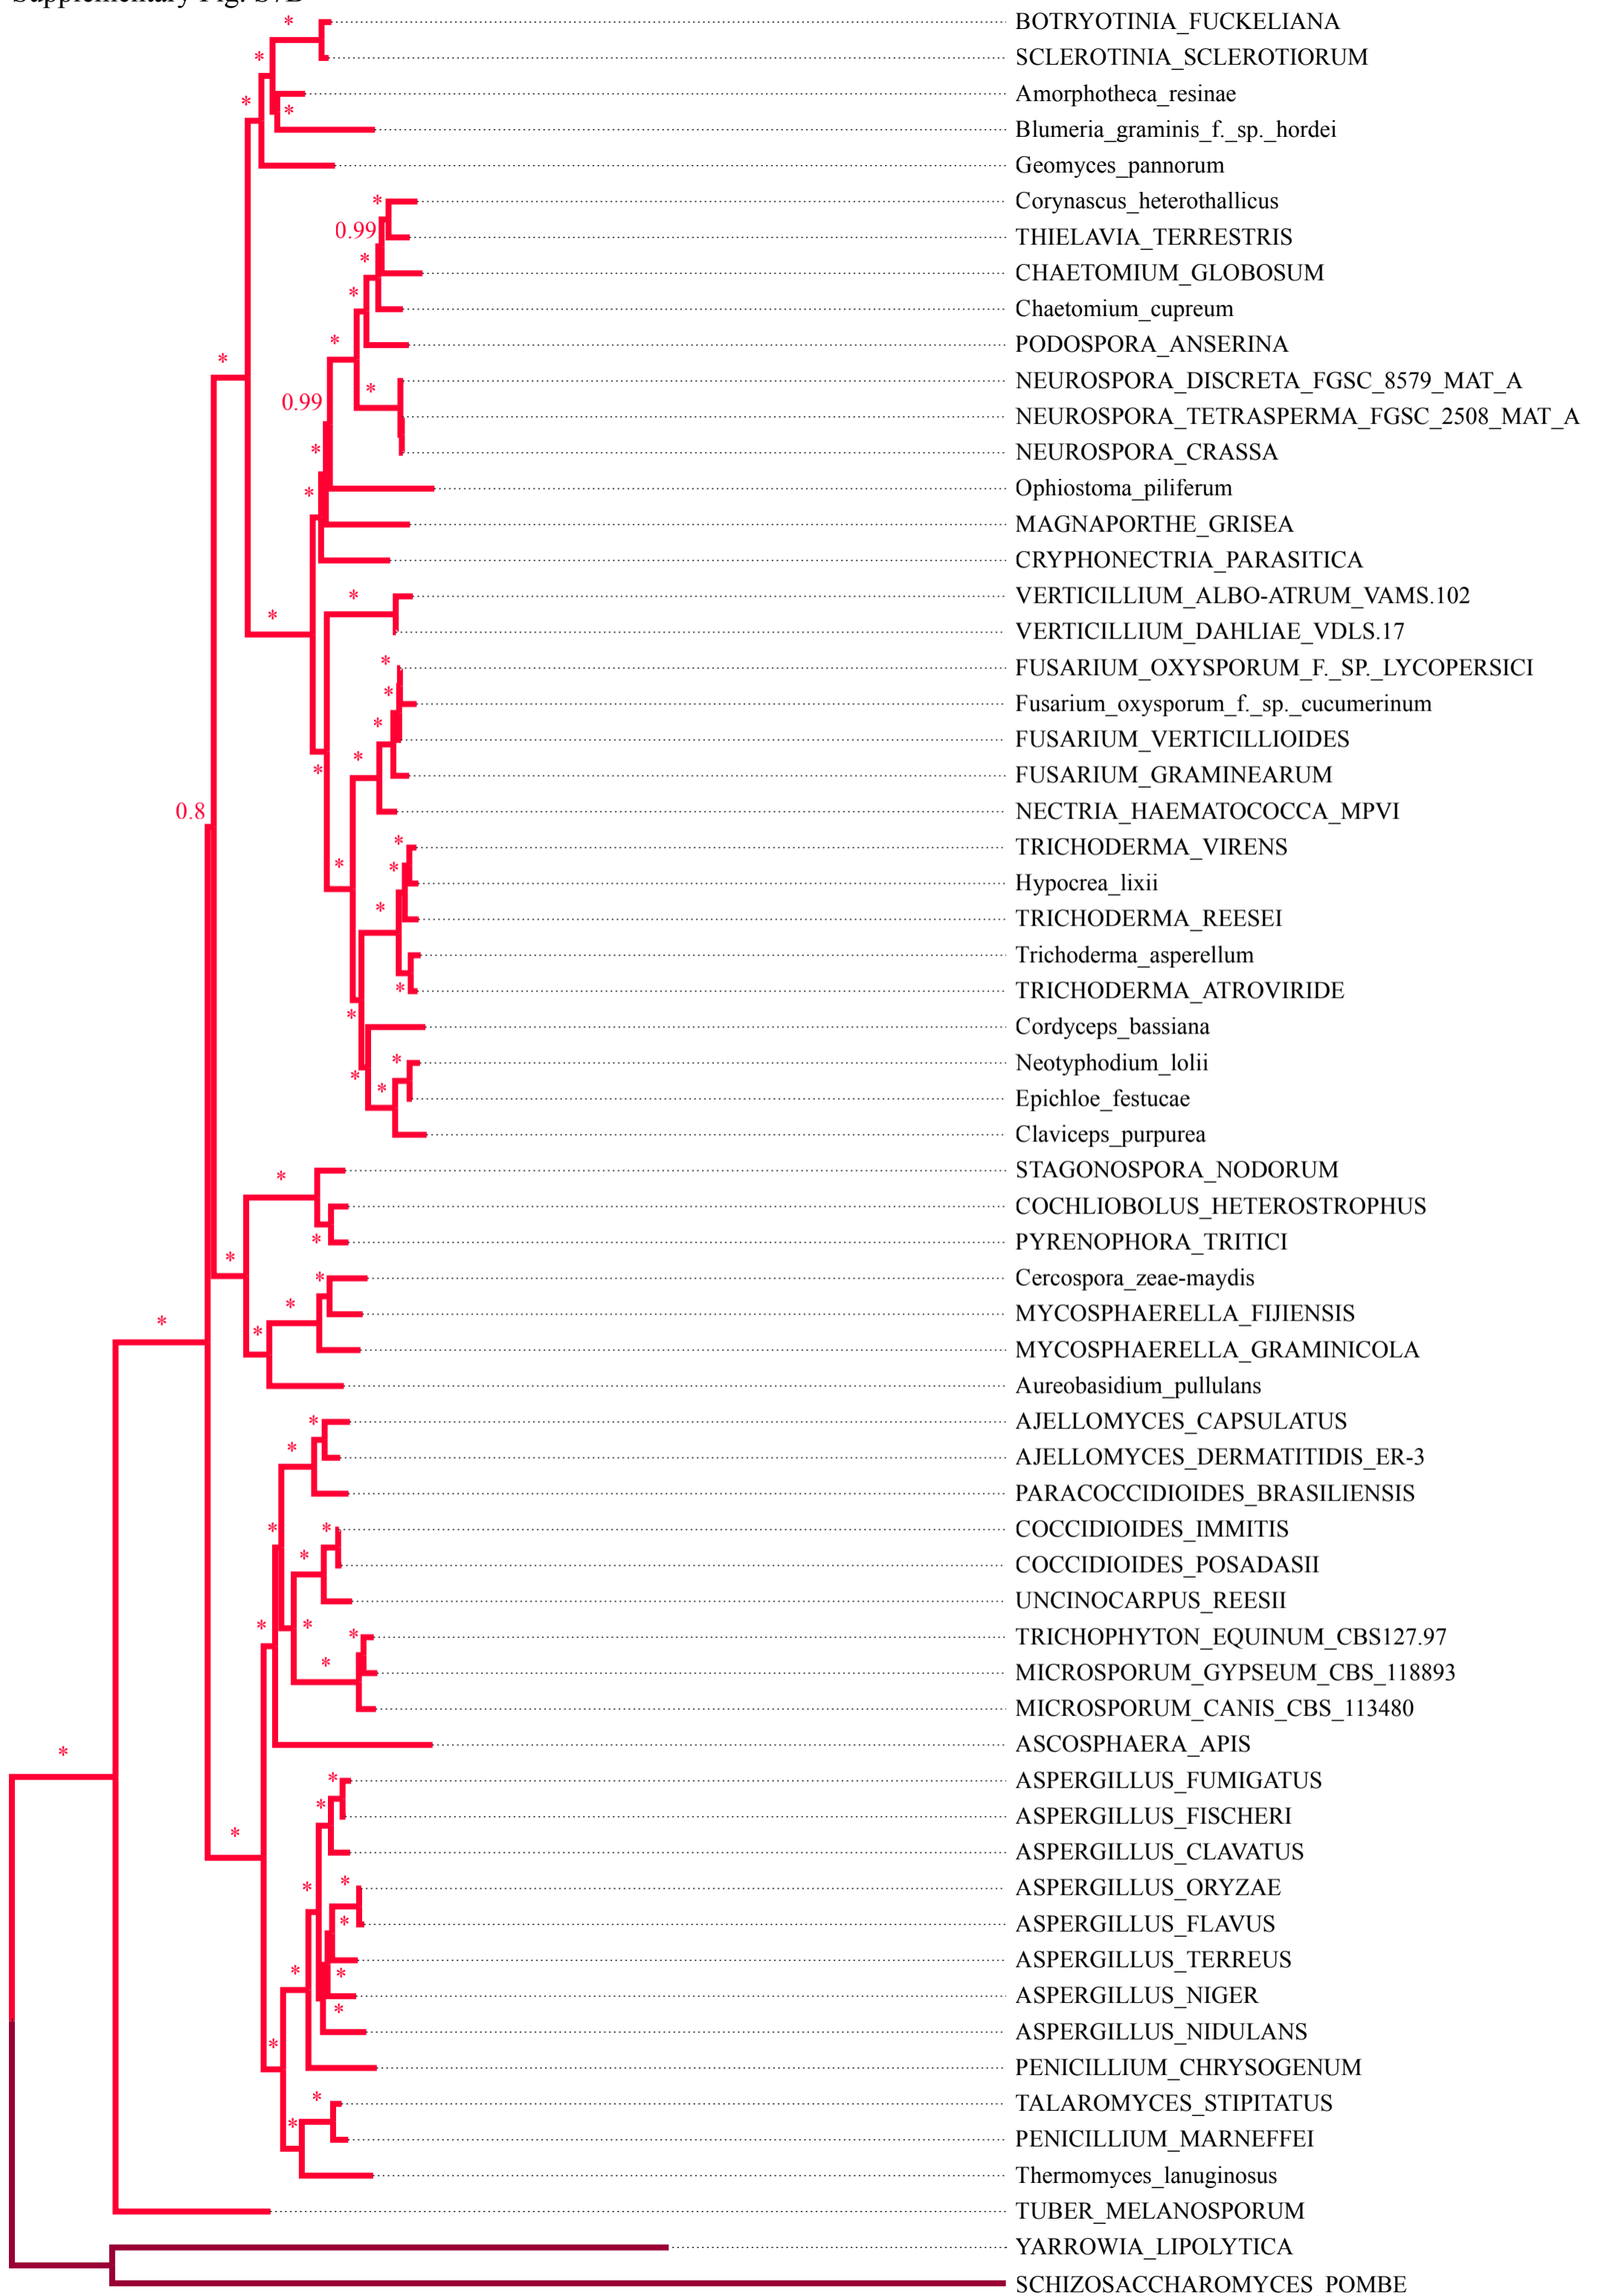

0.2



Supplementary Fig. S8

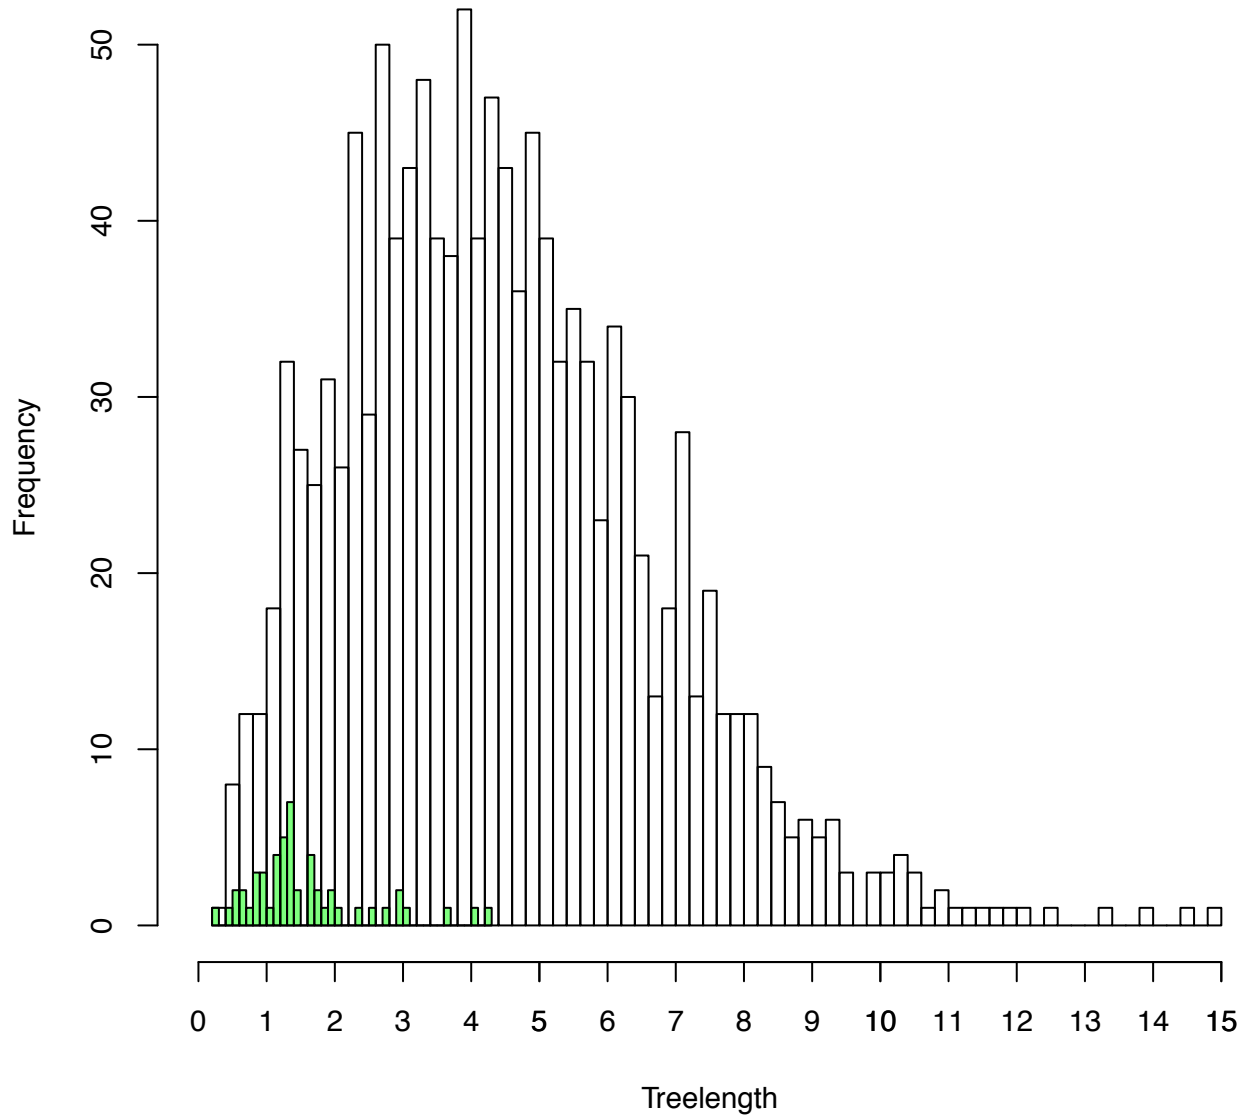

# Supplementary Fig. S9

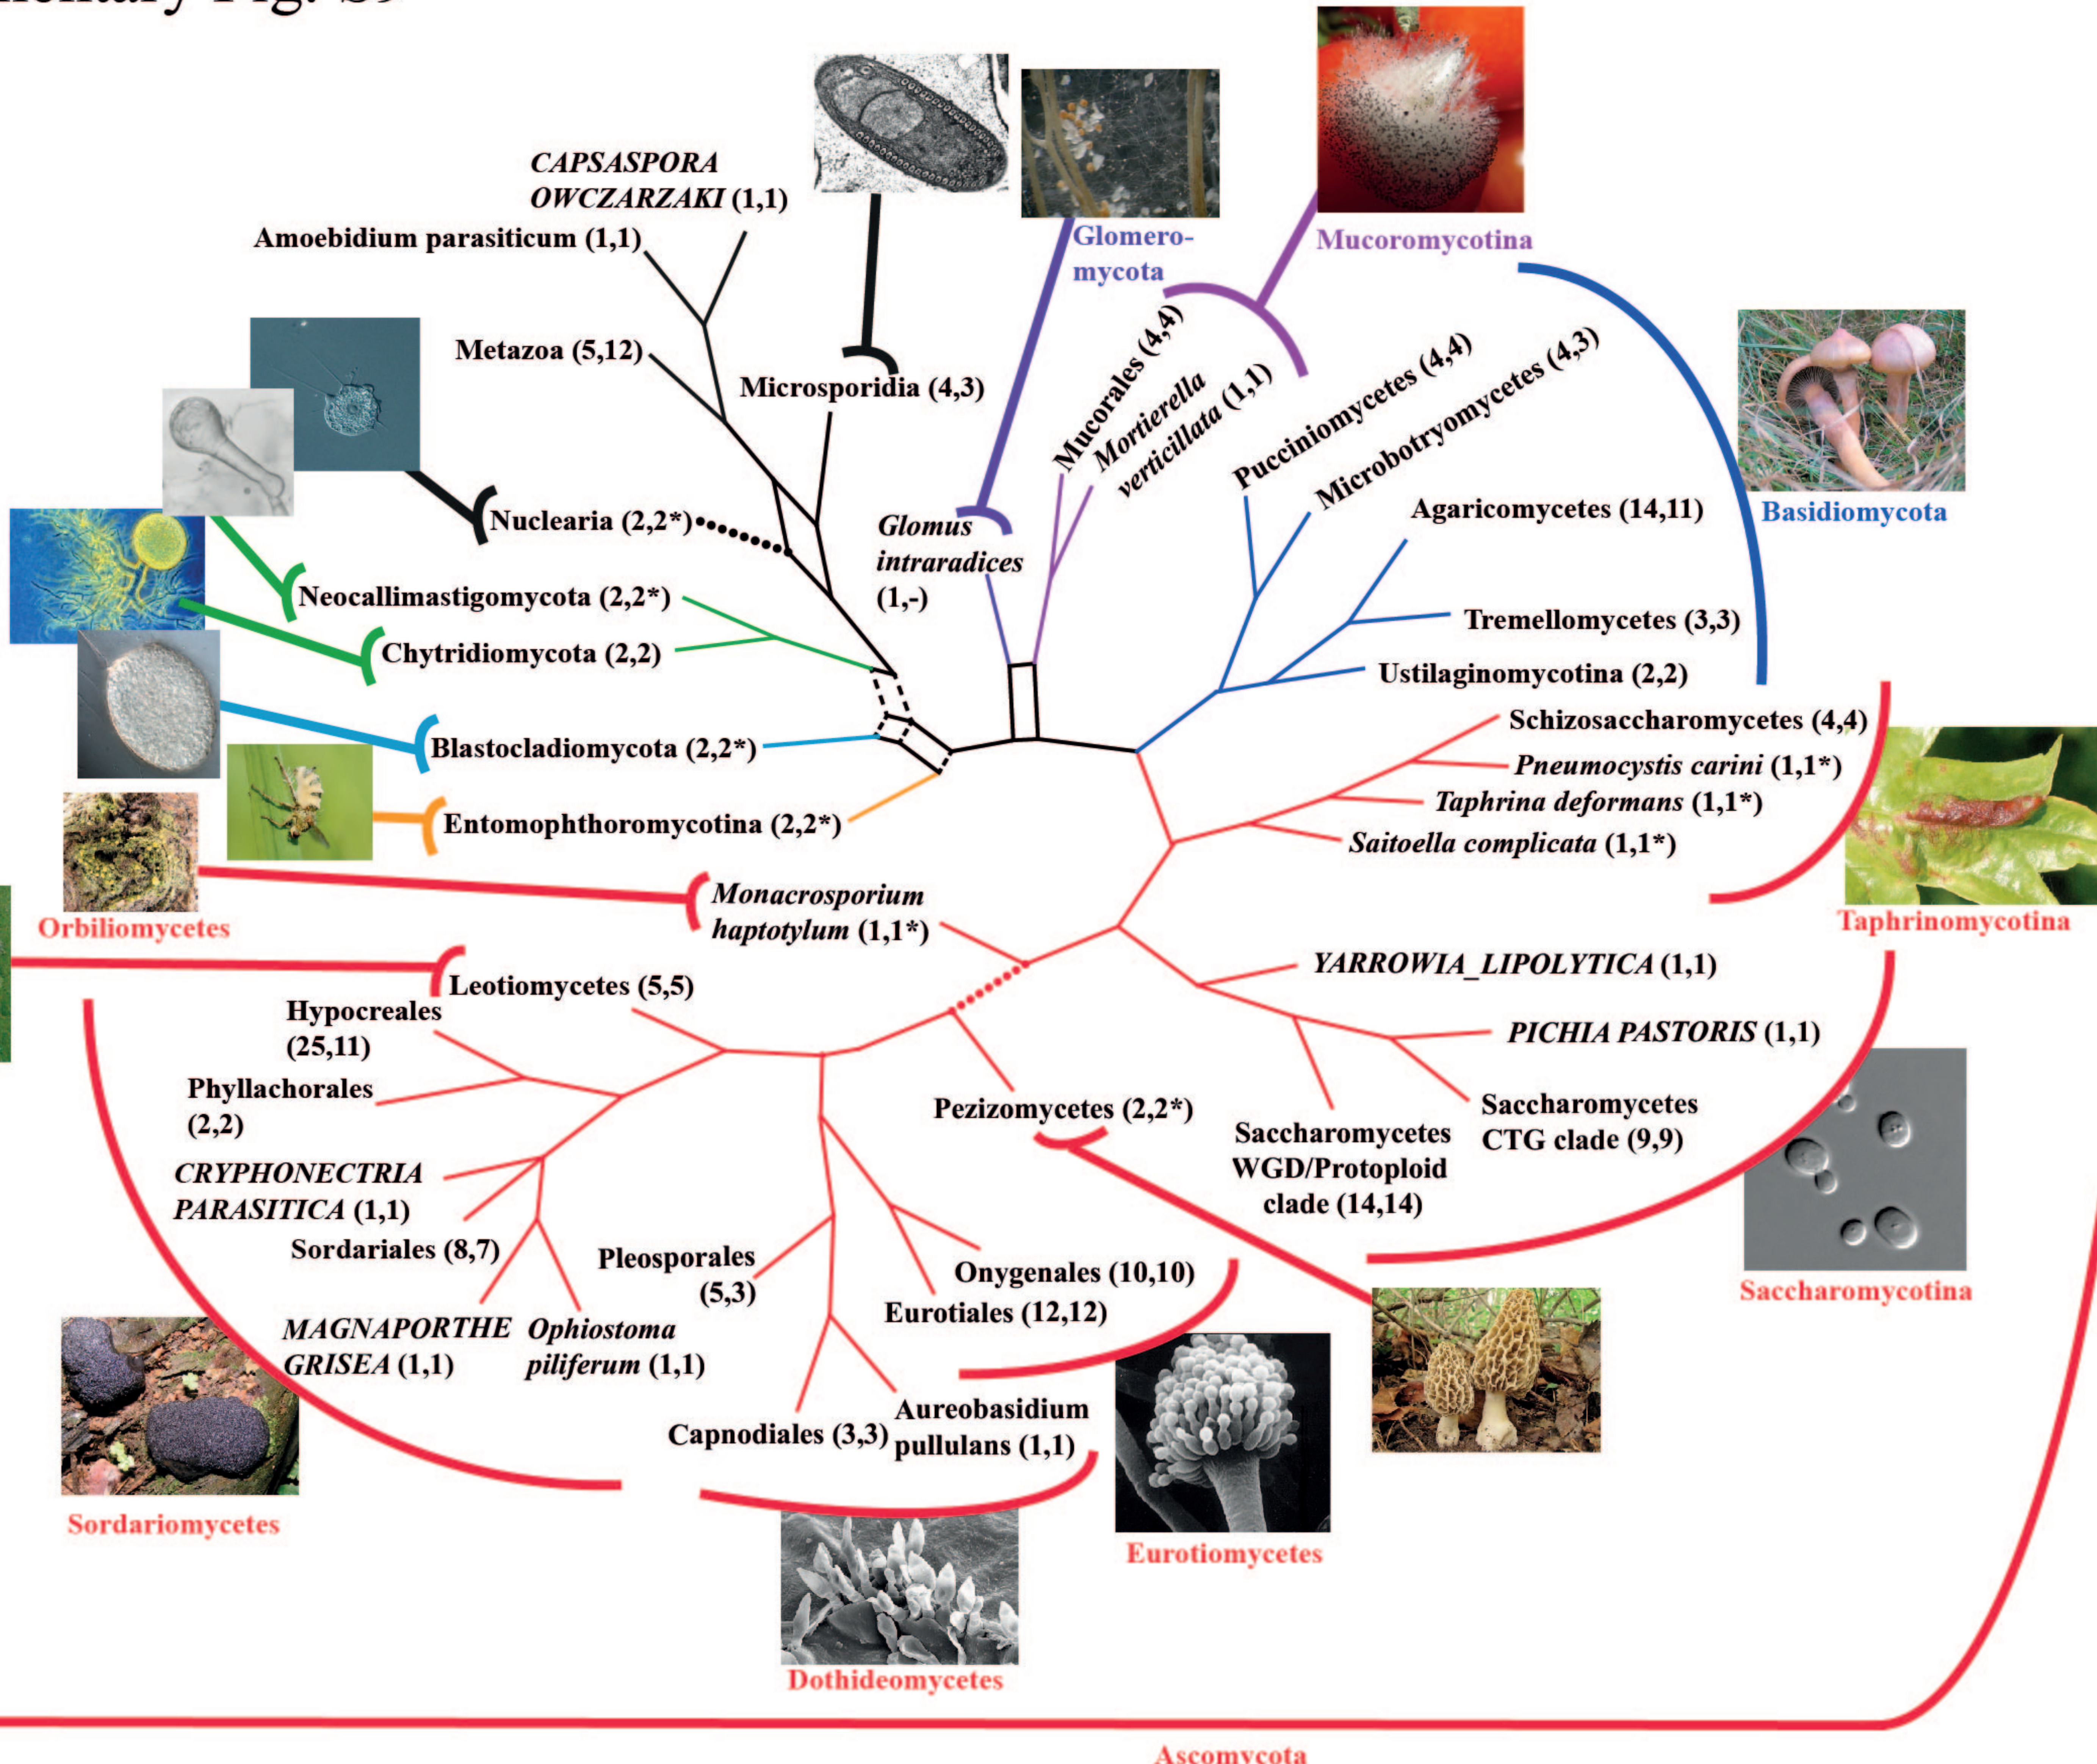

Supplement: supp_msr285_MSR285_ebersberger11-0660.SupplMat.pdf [file supp_msr285_MSR285_ebersberger11-0660.SupplMat.pdf]
