# Supplementary figures and images for: A Consistent Phylogenetic Backbone for the Fungi
Source: PubMed Central journal article supplement — Mol Biol Evol. 2011 Nov 22;29(5):1319–34. doi: 10.1093/molbev/msr285 (PMC3339314; doi:10.1093/molbev/msr285), 2011-11-22

**Supplementary Fig. S4B**  
**fungi\_2; Biological Process**

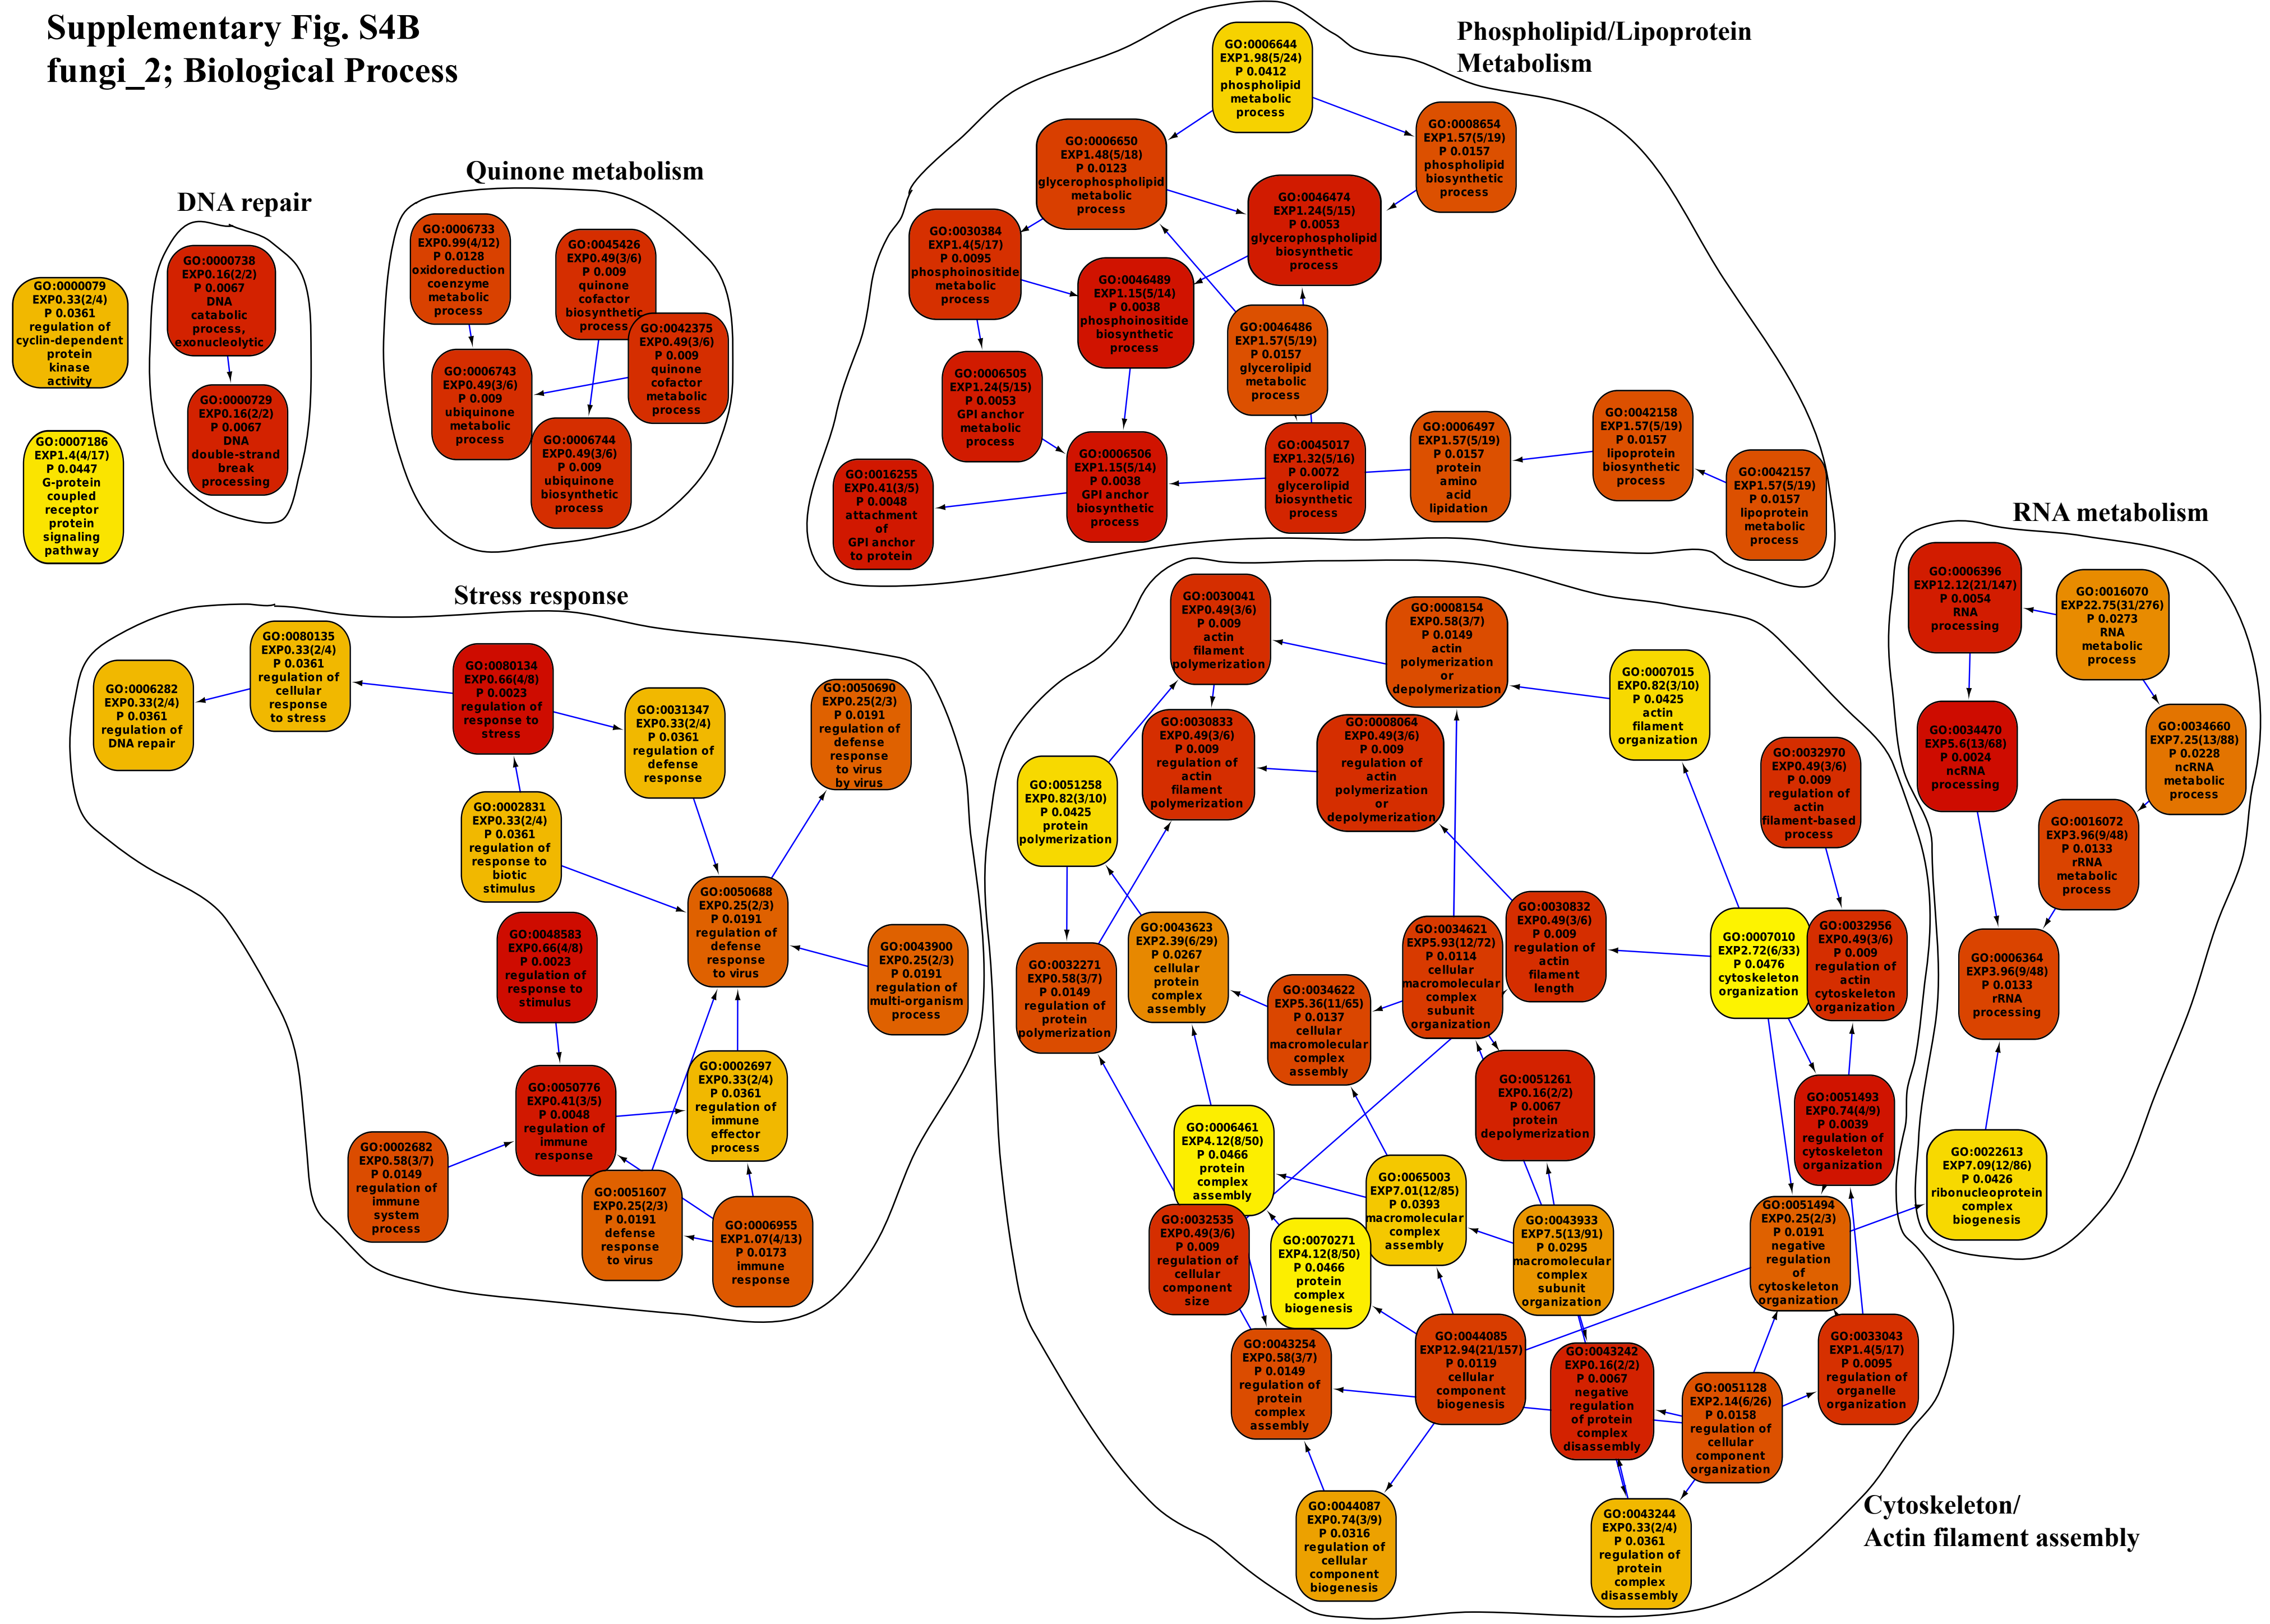

Supplement: supp_msr285_MSR285_ebersberger11-0660.SupplFigS4B.pdf [file supp_msr285_MSR285_ebersberger11-0660.SupplFigS4B.pdf]
